# Supplementary material for: Evaluation of the dependence of radiomic features on the machine learning model
Source: PubMed Central journal article supplement (PMC8873309; doi:10.1186/s13244-022-01170-2), 2022-02-24
Supplement: 13244_2022_1170_MOESM2_ESM.pdf [file 13244_2022_1170_MOESM2_ESM.pdf]

## Supplemental 2

### Stability vs. number of features

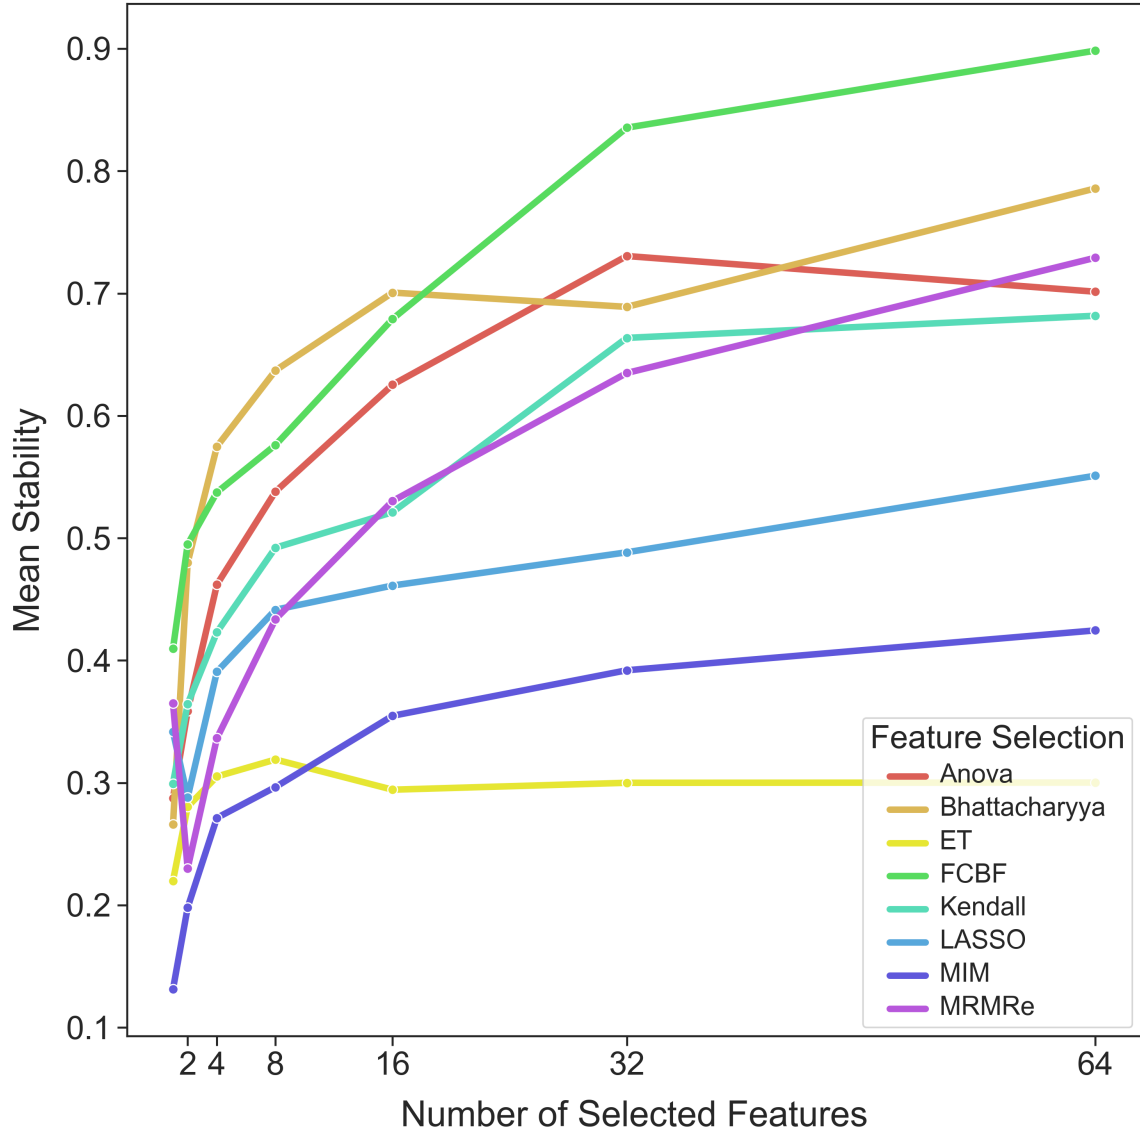

Figure S1: Relation of feature stability with the number of selected features.

Arita2018

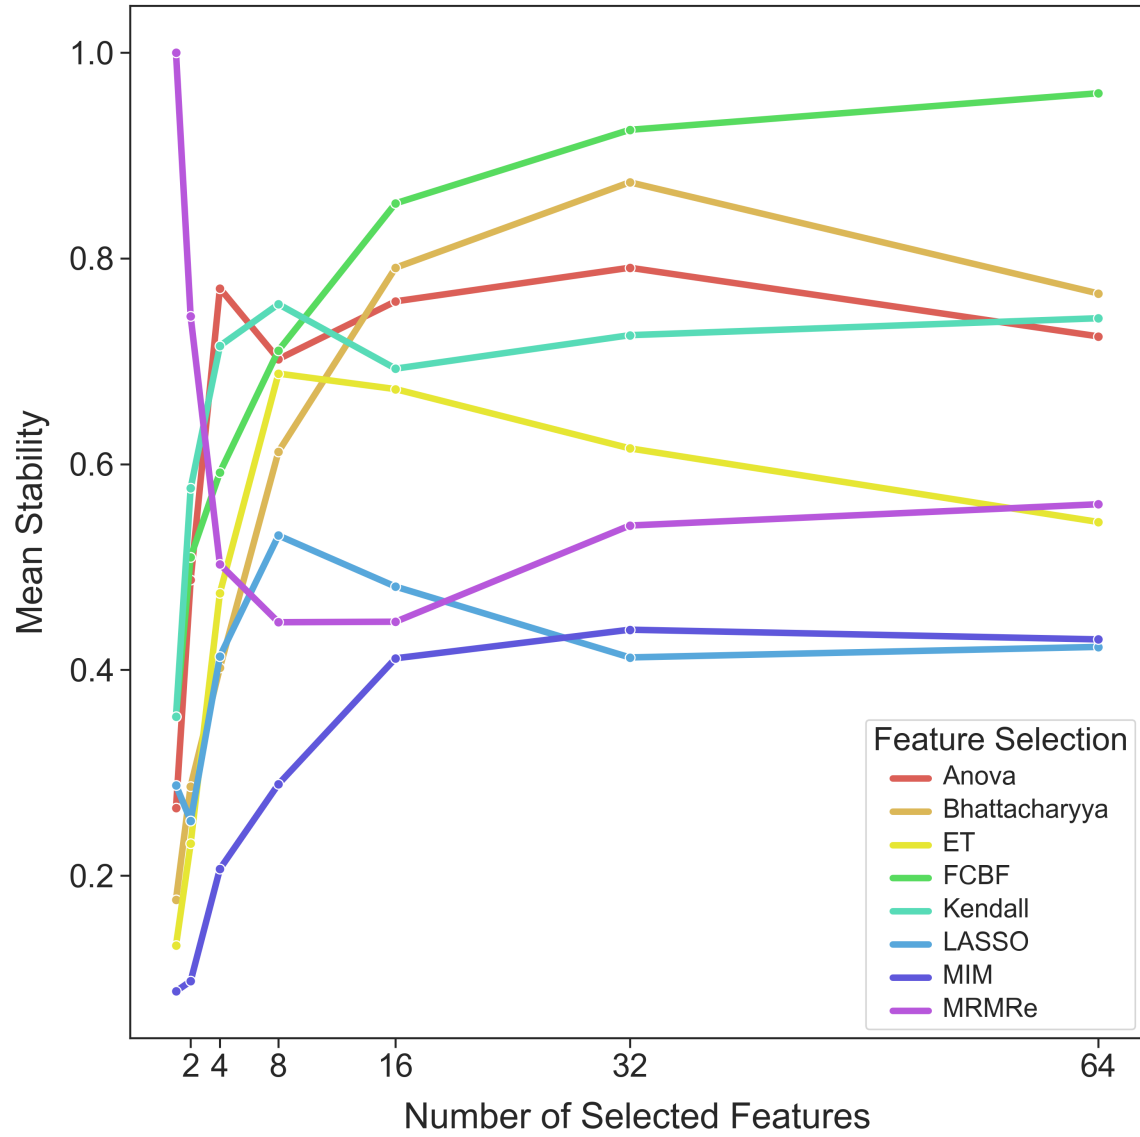

Figure S2: Relation of feature stability with the number of selected features on dataset Arita2018.

Carvalho2018

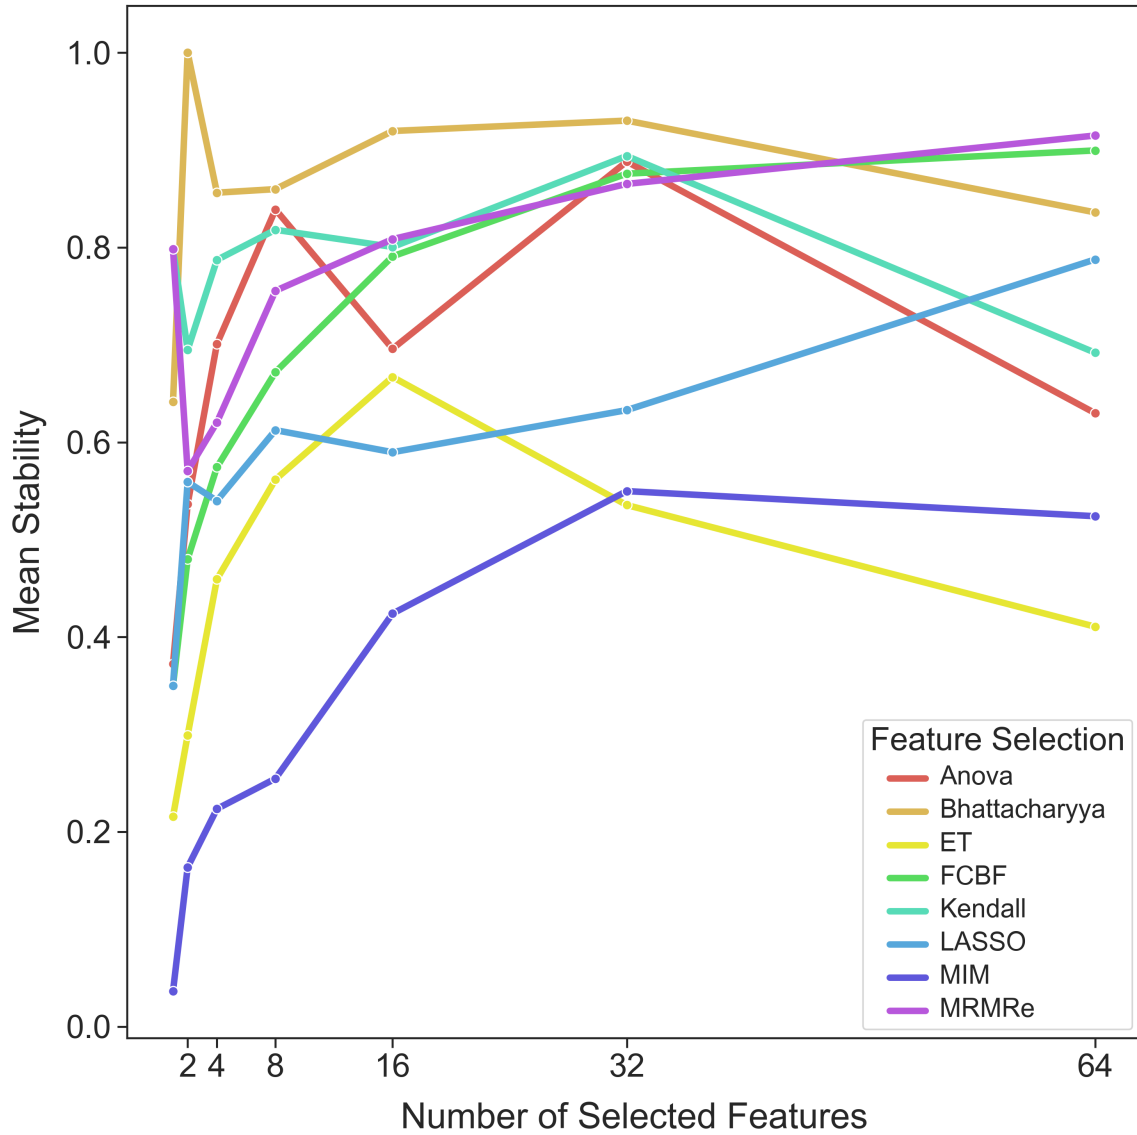

Figure S3: Relation of feature stability with the number of selected features on dataset Carvalho2018.

Hosny2018A

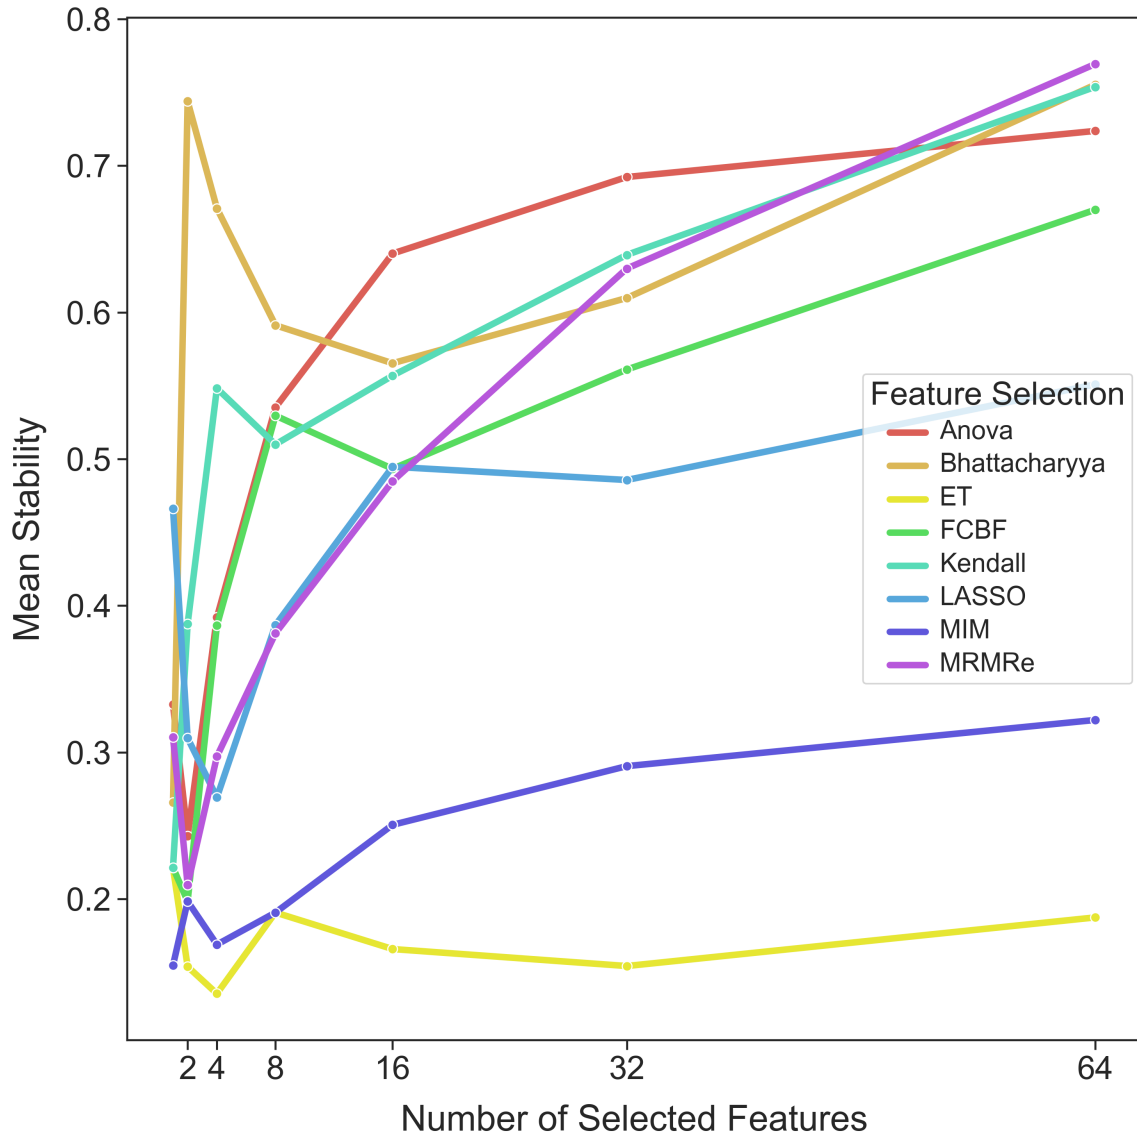

Figure S4: Relation of feature stability with the number of selected features on dataset Hosny2018A.

Hosny2018B

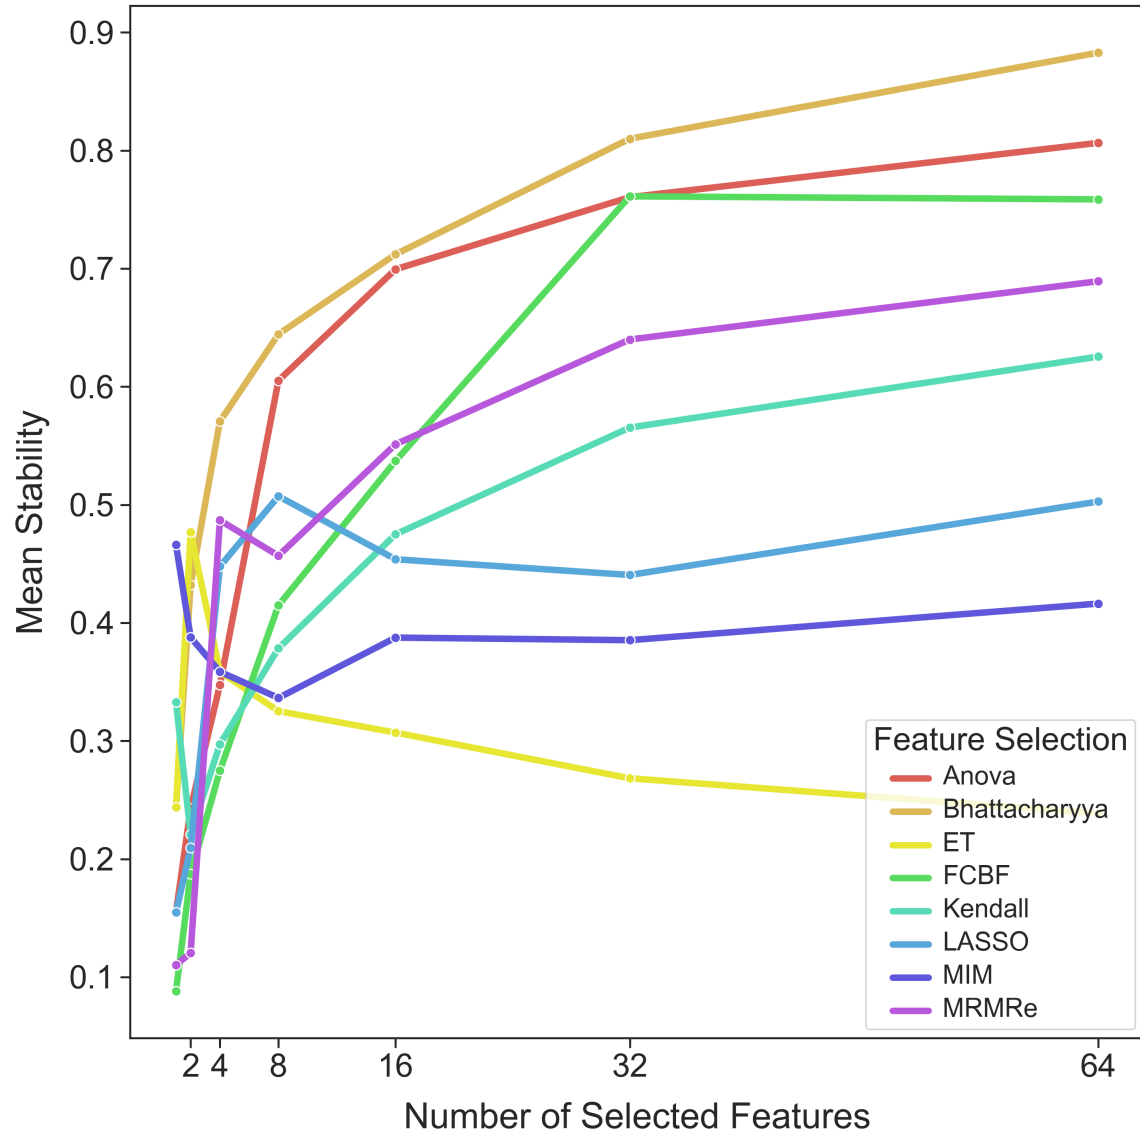

Figure S5: Relation of feature stability with the number of selected features on dataset Hosny2018B.

Hosny2018C

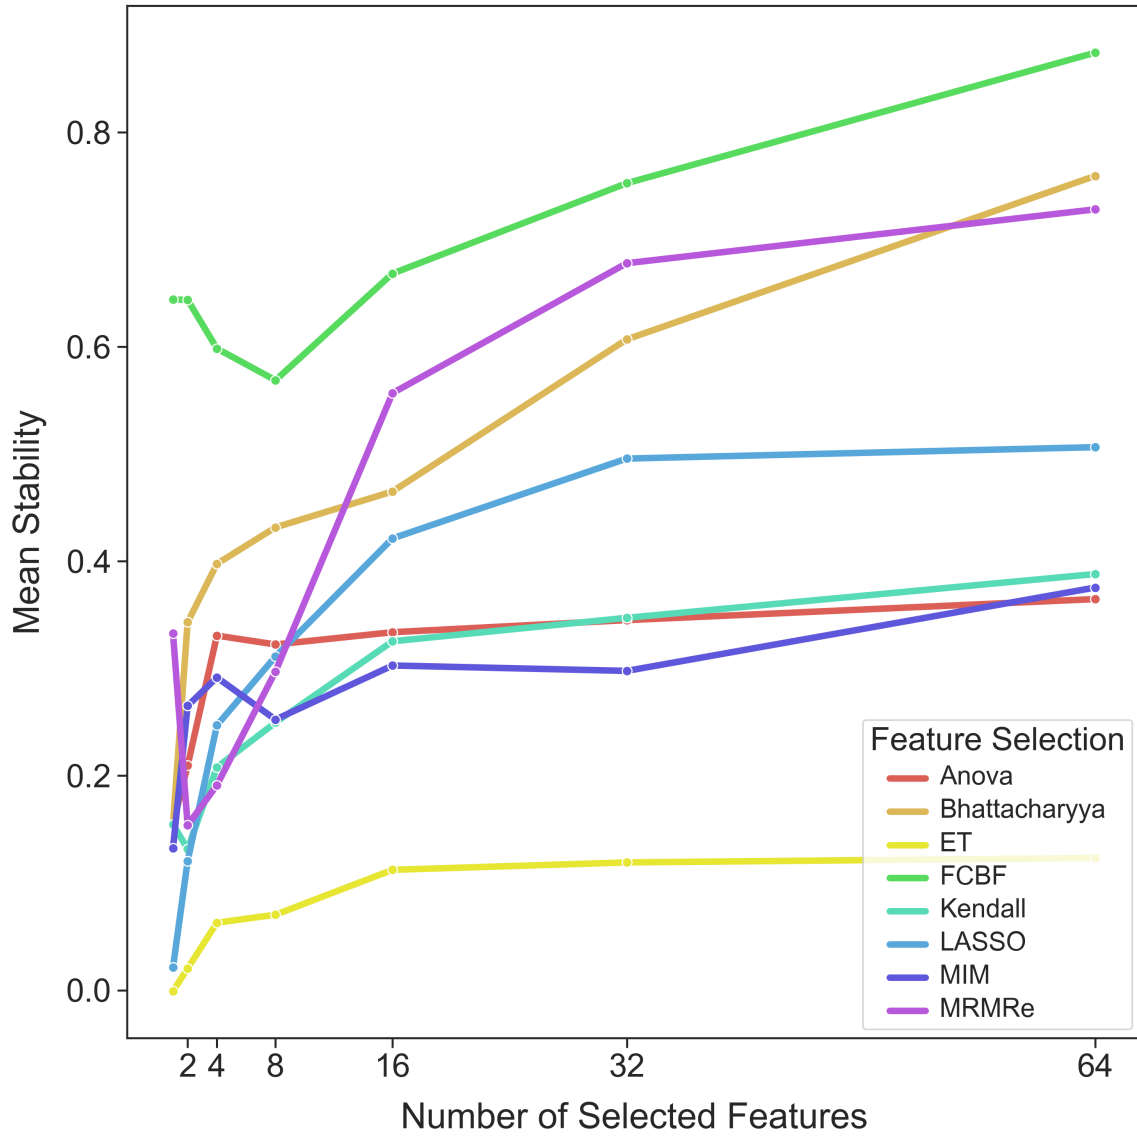

Figure S6: Relation of feature stability with the number of selected features on dataset Hosny2018C.

Ramella2018

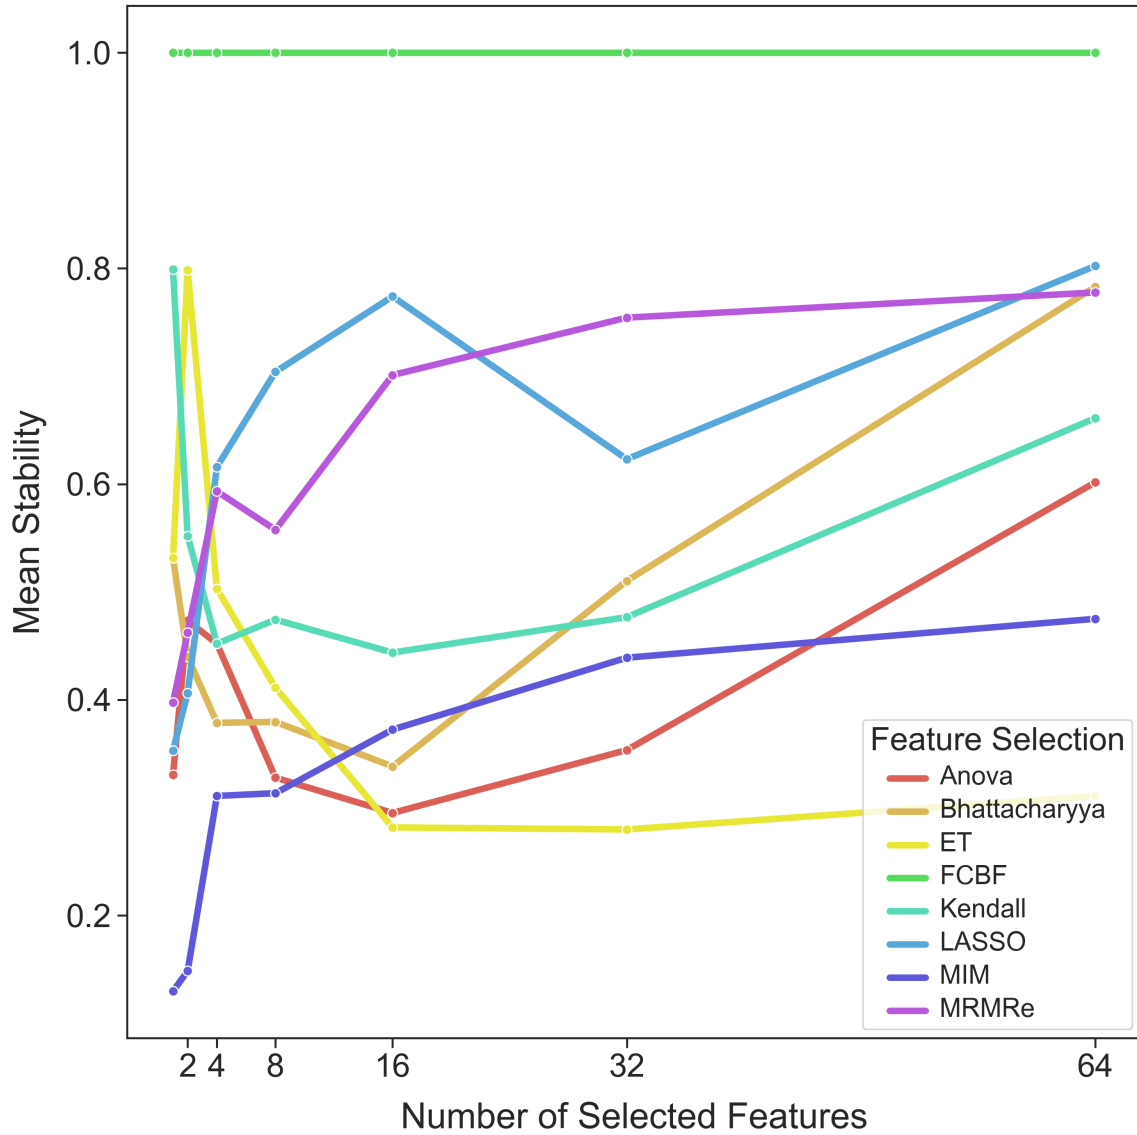

Figure S7: Relation of feature stability with the number of selected features on dataset Ramella2018.

Lu2019

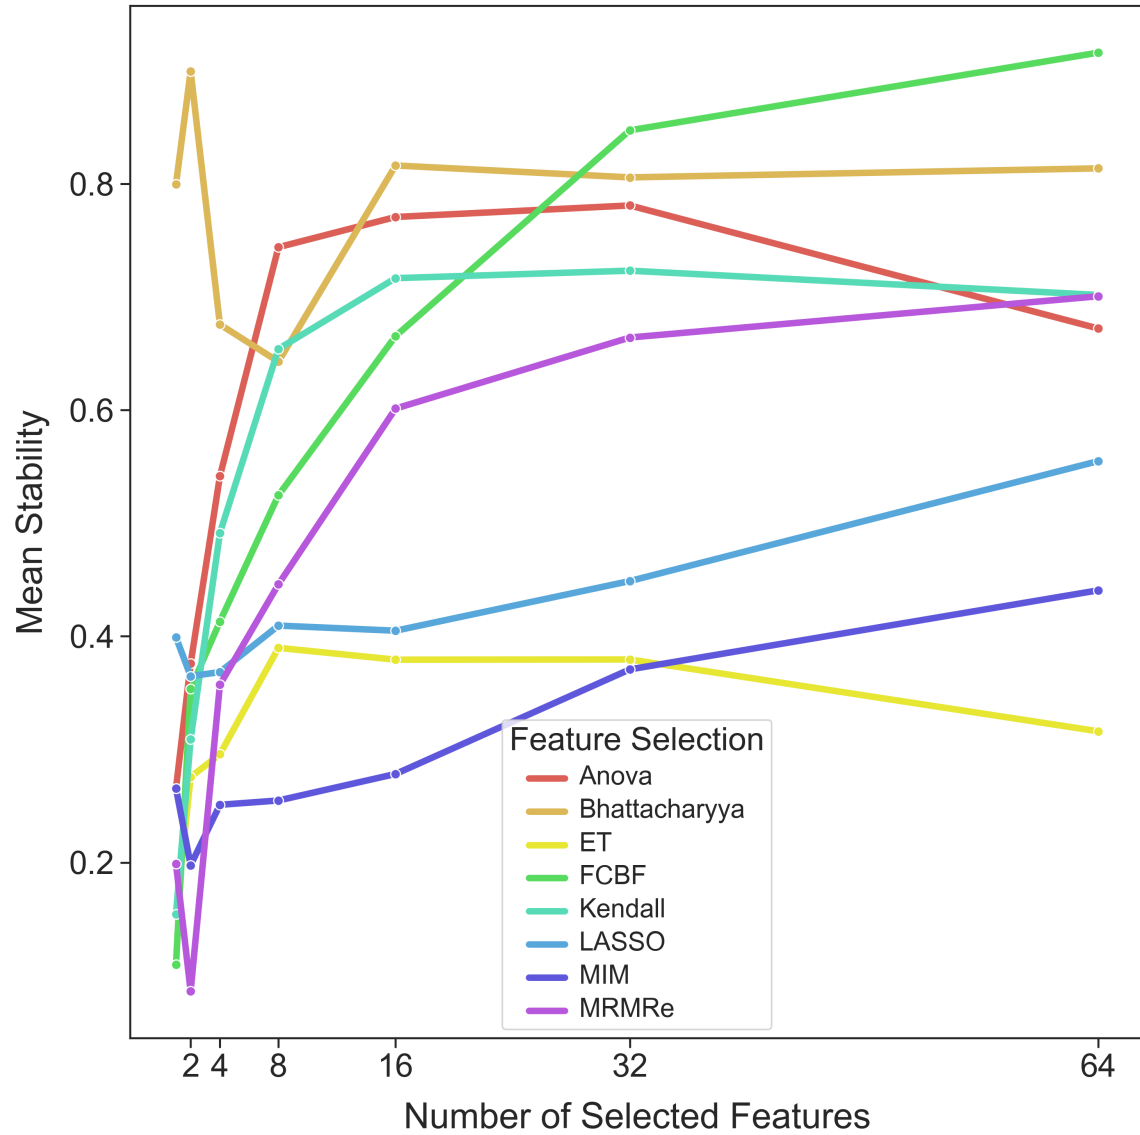

Figure S8: Relation of feature stability with the number of selected features on dataset Lu2019.



Sasaki2019

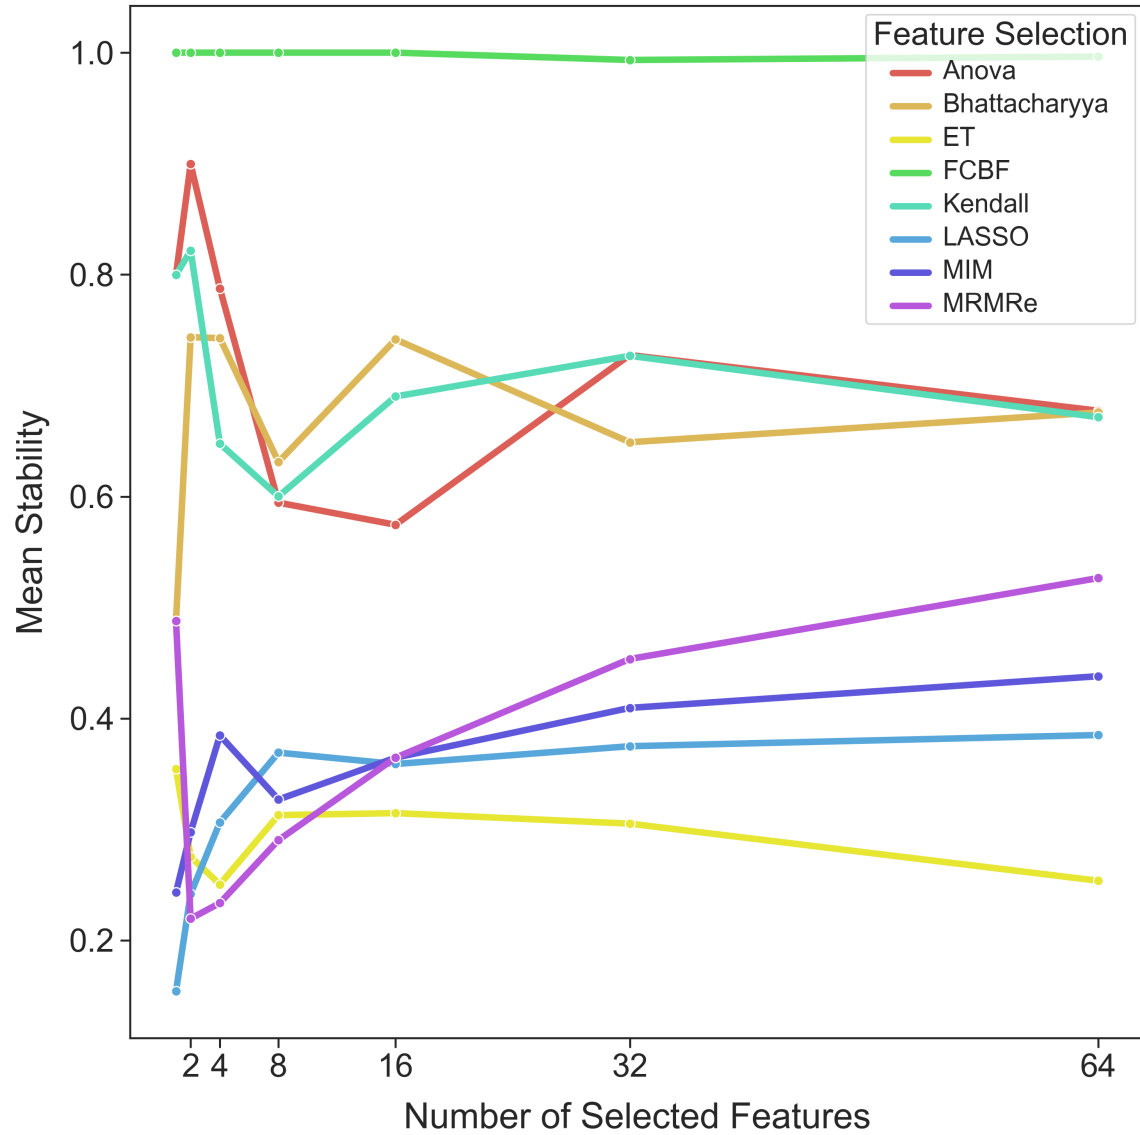

Figure S9: Relation of feature stability with the number of selected features on dataset Sasaki2019.

Toivonen2019

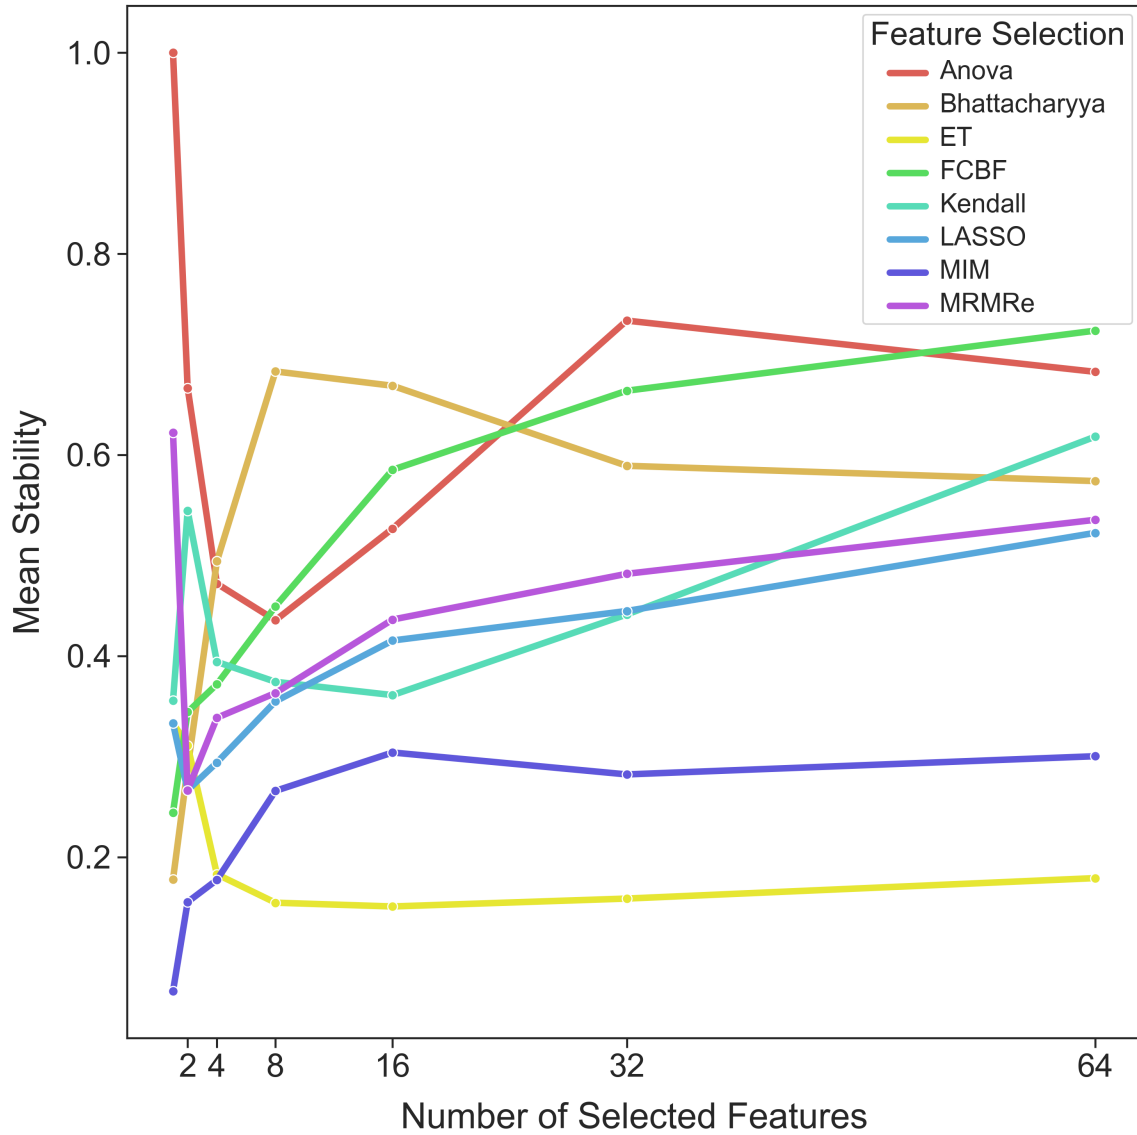

Figure S10: Relation of feature stability with the number of selected features on dataset Toivonen2019.

Keek2020

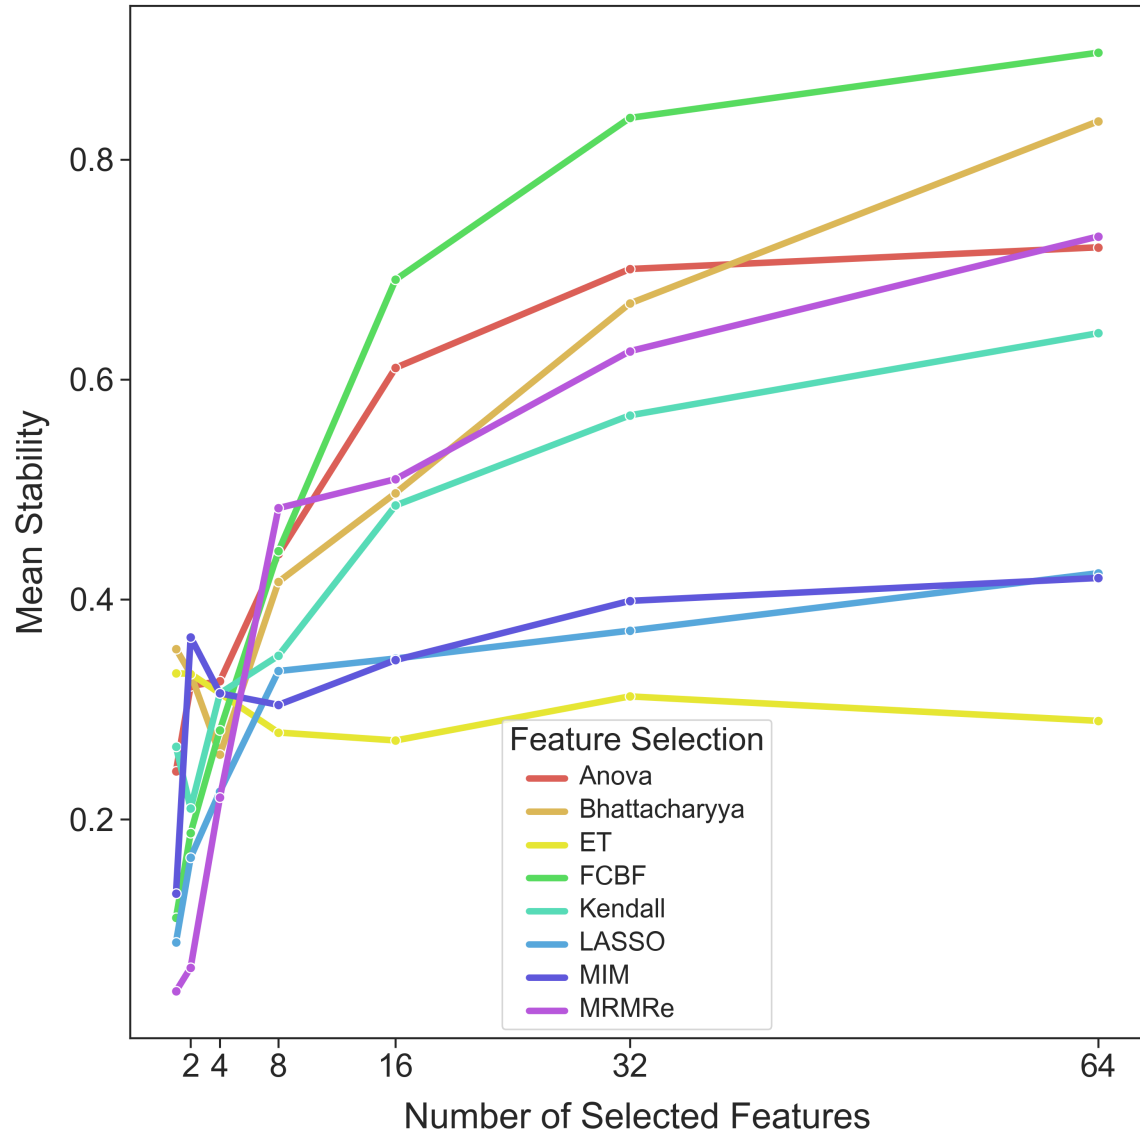

Figure S11: Relation of feature stability with the number of selected features on dataset Keek2020.

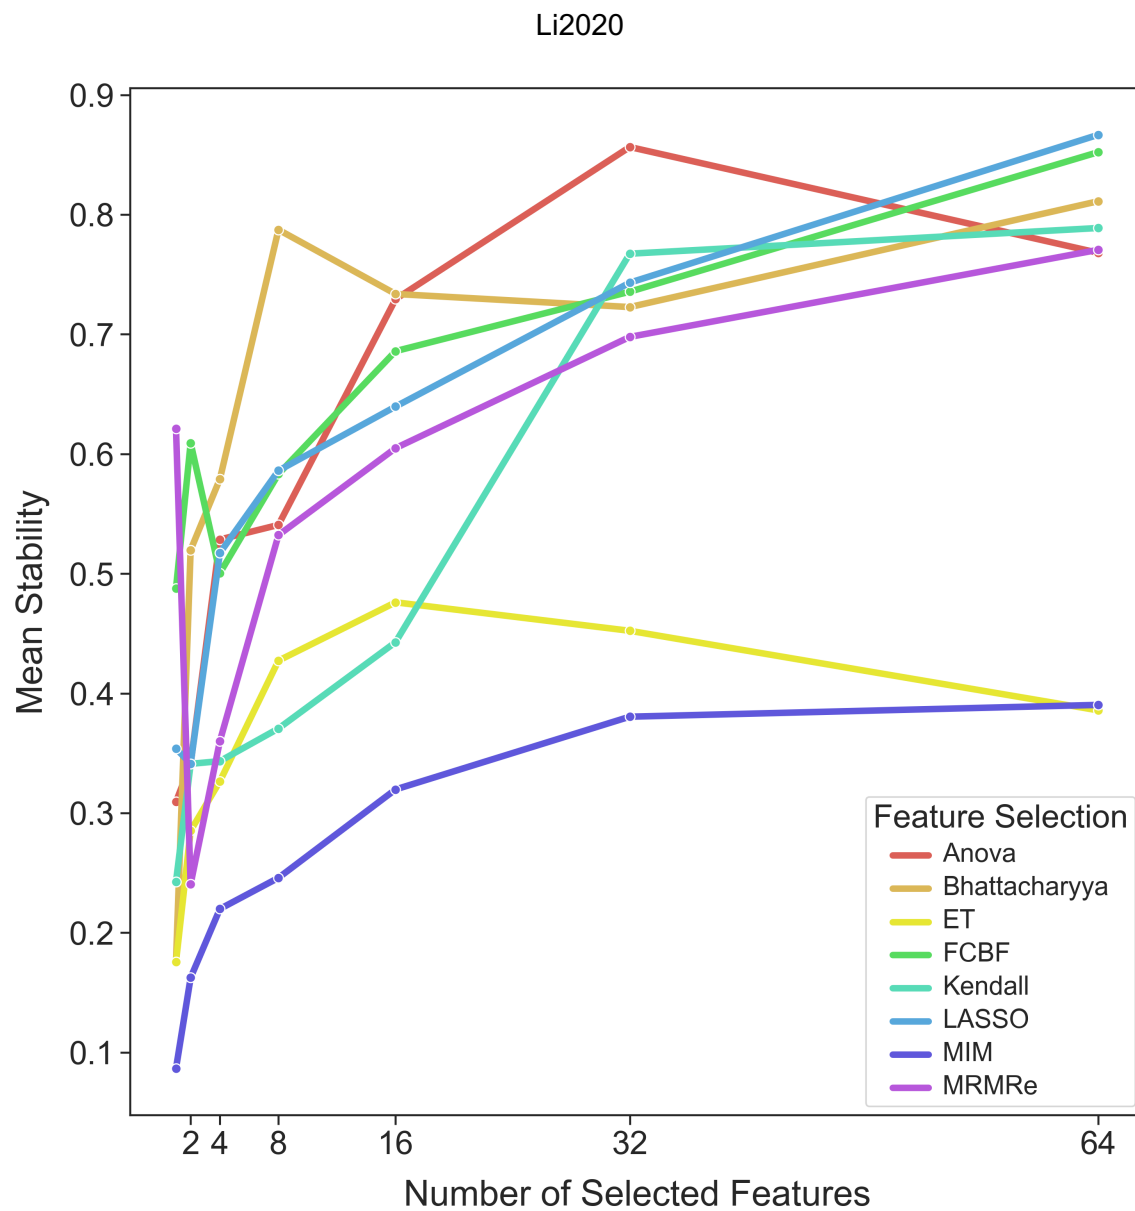

Figure S12: Relation of feature stability with the number of selected features on dataset Li2020.

Park2020

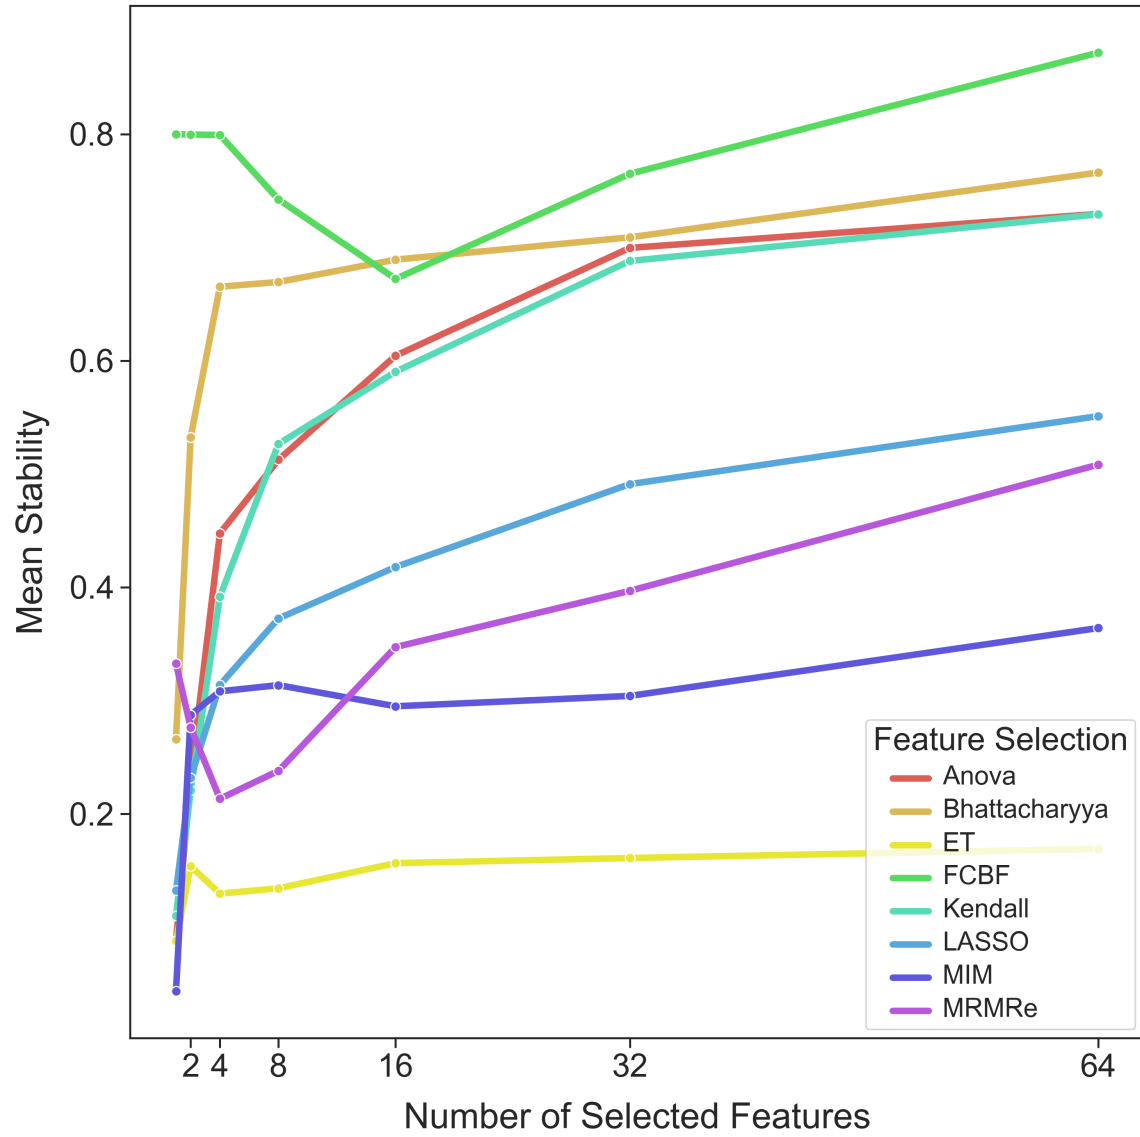

Figure S13: Relation of feature stability with the number of selected features on dataset Park2020.

Song2020

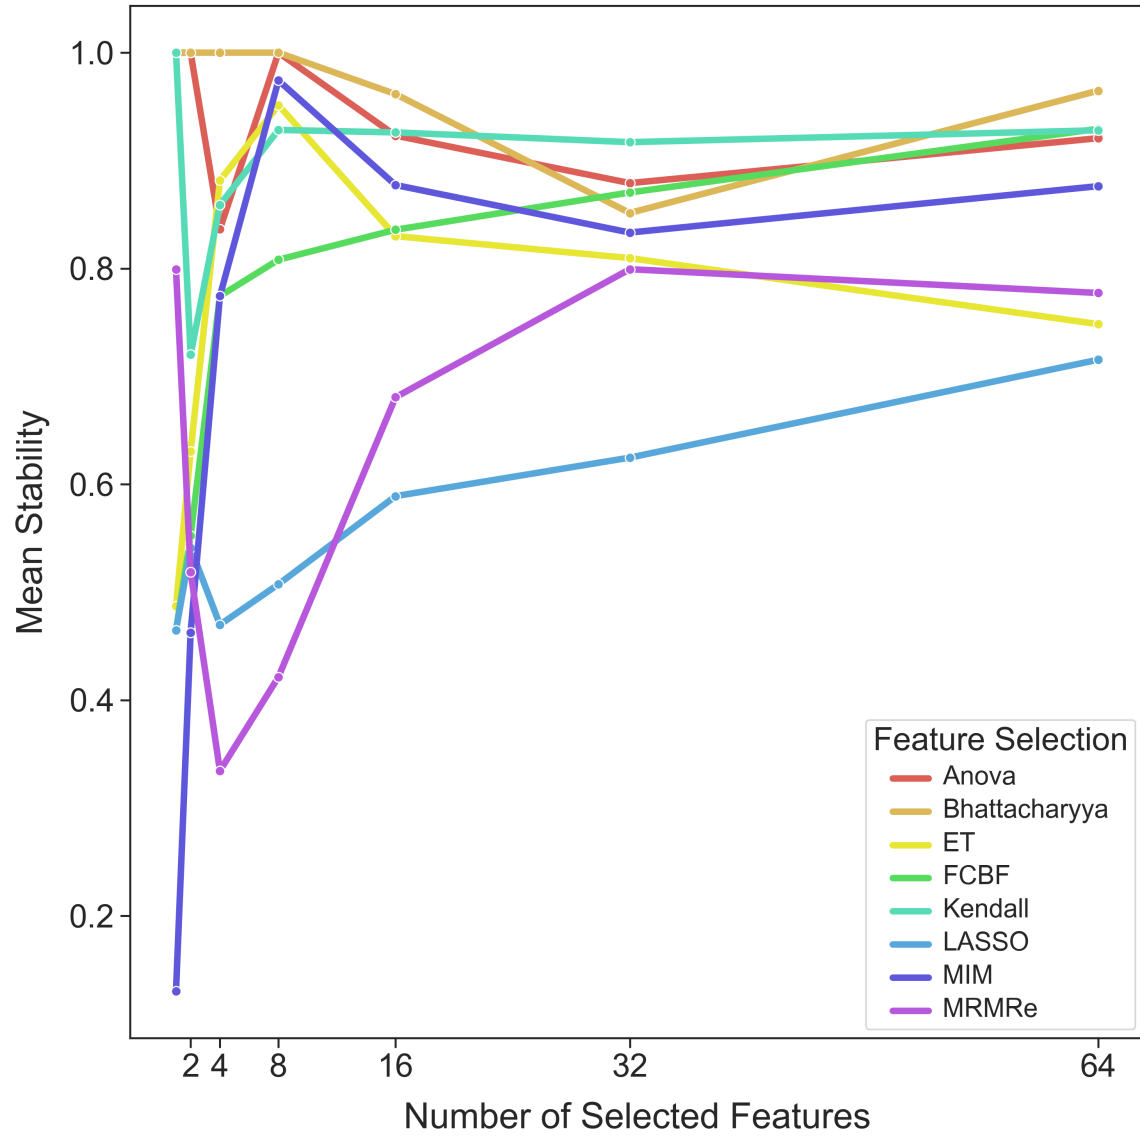

Figure S14: Relation of feature stability with the number of selected features on dataset Song2020.

Veeraraghavan2020

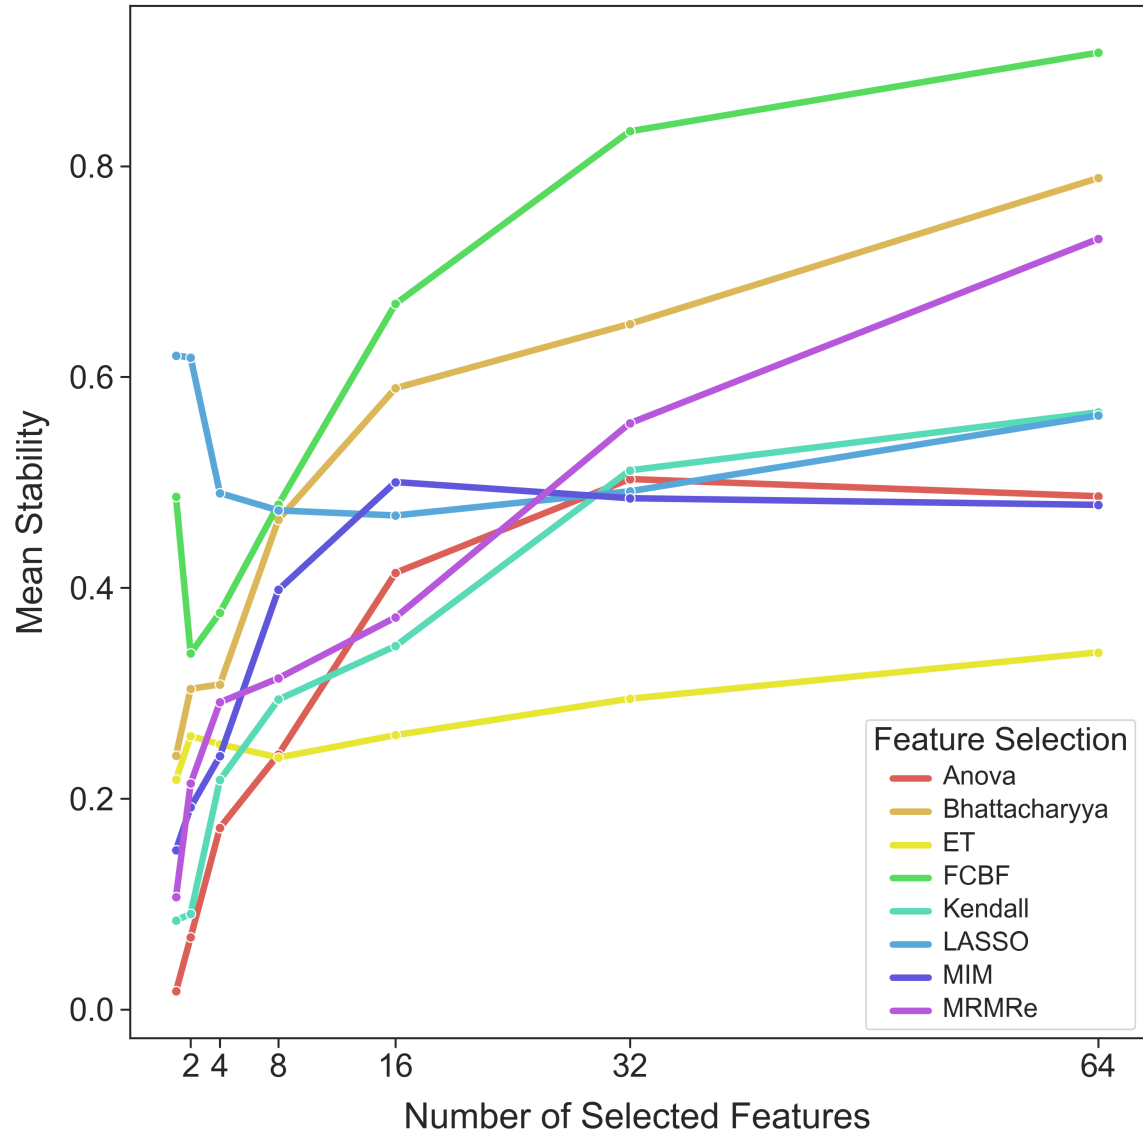

Figure S15: Relation of feature stability with the number of selected features on dataset Veeraraghavan2020.
