# Supplementary material for: Evaluation of the dependence of radiomic features on the machine learning model
Source: PubMed Central journal article supplement (PMC8873309; doi:10.1186/s13244-022-01170-2), 2022-02-24
Supplement: 13244_2022_1170_MOESM4_ESM.pdf [file 13244_2022_1170_MOESM4_ESM.pdf]

## Supplemental 4

### Feature Similarity

#### Similarity on Arita2018

|                     |                                             |                                                  |                                            |                                             |                                            |                                             |                                             |       |
|---------------------|---------------------------------------------|--------------------------------------------------|--------------------------------------------|---------------------------------------------|--------------------------------------------|---------------------------------------------|---------------------------------------------|-------|
| LDA                 |                                             | <b>0.54</b><br>AUC:0.83 (p=1.0)<br>#Features: 64 | 0.15<br>AUC:0.8 (p=0.302)<br>#Features: 16 | 0.46<br>AUC:0.8 (p=0.098)<br>#Features: 64  |                                            |                                             |                                             |       |
| Logistic Regression |                                             | 0.54<br>AUC:0.82 (p=0.642)<br>#Features: 64      | 0.15<br>AUC:0.8 (p=0.334)<br>#Features: 16 |                                             |                                            | 0.17<br>AUC:0.78 (p=0.052)<br>#Features: 64 |                                             |       |
| Naive Bayes         |                                             |                                                  |                                            |                                             |                                            |                                             |                                             |       |
| Neural Network      | 0.32<br>AUC:0.74 (p=0.051)<br>#Features: 16 | 0.45<br>AUC:0.82 (p=0.687)<br>#Features: 16      |                                            |                                             | 0.19<br>AUC:0.78 (p=0.114)<br>#Features: 8 |                                             |                                             |       |
| RBF-SVM             |                                             | 0.55<br>AUC:0.79 (p=0.069)<br>#Features: 32      |                                            |                                             |                                            |                                             | 0.23<br>AUC:0.77 (p=0.083)<br>#Features: 8  |       |
| Random Forest       | 0.32<br>AUC:0.77 (p=0.116)<br>#Features: 16 | 0.54<br>AUC:0.79 (p=0.086)<br>#Features: 64      |                                            |                                             |                                            |                                             |                                             |       |
| SVM                 |                                             | 0.54<br>AUC:0.82 (p=0.492)<br>#Features: 64      | 0.15<br>AUC:0.8 (p=0.364)<br>#Features: 16 | 0.46<br>AUC:0.79 (p=0.056)<br>#Features: 64 |                                            | 0.17<br>AUC:0.78 (p=0.062)<br>#Features: 64 |                                             |       |
| XGBoost             |                                             | 0.55<br>AUC:0.81 (p=0.433)<br>#Features: 32      |                                            |                                             |                                            |                                             | 0.25<br>AUC:0.79 (p=0.181)<br>#Features: 16 |       |
|                     | Anova                                       | Bhattacharyya                                    | ET                                         | FCBF                                        | Kendall                                    | LASSO                                       | MM                                          | MRMRc |

Figure S30: Similarity of the models on dataset Arita2018. The best model is framed with a blue border, models that were significantly different to the best model are not shown. Statistical significance was tested using a DeLong test.

## Similarity on Carvalho2018

|                     |                                             |                                              |                                             |                                             |                                             |                                             |                                             |                                             |
|---------------------|---------------------------------------------|----------------------------------------------|---------------------------------------------|---------------------------------------------|---------------------------------------------|---------------------------------------------|---------------------------------------------|---------------------------------------------|
| LDA                 | 0.16<br>AUC:0.62 (p=0.238)<br>#Features: 4  | -0.05<br>AUC:0.62 (p=0.223)<br>#Features: 2  | 0.18<br>AUC:0.61 (p=0.152)<br>#Features: 4  |                                             | 0.15<br>AUC:0.62 (p=0.207)<br>#Features: 4  |                                             | 0.02<br>AUC:0.6 (p=0.144)<br>#Features: 4   | 0.23<br>AUC:0.61 (p=0.159)<br>#Features: 2  |
| Logistic Regression | 0.23<br>AUC:0.62 (p=0.214)<br>#Features: 8  | -0.05<br>AUC:0.62 (p=0.228)<br>#Features: 2  | 0.18<br>AUC:0.61 (p=0.144)<br>#Features: 4  |                                             | 0.16<br>AUC:0.62 (p=0.221)<br>#Features: 8  | 0.26<br>AUC:0.61 (p=0.128)<br>#Features: 16 | 0.02<br>AUC:0.61 (p=0.166)<br>#Features: 4  | 0.23<br>AUC:0.62 (p=0.21)<br>#Features: 2   |
| Naive Bayes         | 0.16<br>AUC:0.62 (p=0.211)<br>#Features: 16 | -0.05<br>AUC:0.61 (p=0.145)<br>#Features: 2  | 0.27<br>AUC:0.61 (p=0.131)<br>#Features: 16 |                                             | 0.11<br>AUC:0.62 (p=0.229)<br>#Features: 16 |                                             |                                             | 0.23<br>AUC:0.61 (p=0.189)<br>#Features: 2  |
| Neural Network      | 0.11<br>AUC:0.65 (p=0.547)<br>#Features: 64 | -0.01<br>AUC:0.64 (p=0.474)<br>#Features: 64 | 0.23<br>AUC:0.65 (p=0.746)<br>#Features: 8  | 0.03<br>AUC:0.63 (p=0.339)<br>#Features: 16 | 0.16<br>AUC:0.65 (p=0.748)<br>#Features: 8  | 0.26<br>AUC:0.66 (p=0.848)<br>#Features: 16 | 0.07<br>AUC:0.63 (p=0.303)<br>#Features: 64 | 0.81<br>AUC:0.67 (p=1.0)<br>#Features: 16   |
| RBF-SVM             | 0.16<br>AUC:0.65 (p=0.612)<br>#Features: 4  | -0.05<br>AUC:0.61 (p=0.215)<br>#Features: 2  | 0.18<br>AUC:0.6 (p=0.116)<br>#Features: 4   |                                             | 0.15<br>AUC:0.65 (p=0.642)<br>#Features: 4  | 0.26<br>AUC:0.62 (p=0.195)<br>#Features: 16 | -0.01<br>AUC:0.59 (p=0.093)<br>#Features: 2 | 0.81<br>AUC:0.66 (p=0.705)<br>#Features: 16 |
| Random Forest       | 0.23<br>AUC:0.62 (p=0.202)<br>#Features: 8  | 0.01<br>AUC:0.62 (p=0.218)<br>#Features: 8   | 0.27<br>AUC:0.6 (p=0.085)<br>#Features: 16  |                                             | 0.16<br>AUC:0.63 (p=0.327)<br>#Features: 8  |                                             | 0.1<br>AUC:0.6 (p=0.055)<br>#Features: 32   | 0.36<br>AUC:0.65 (p=0.59)<br>#Features: 4   |
| SVM                 | 0.16<br>AUC:0.62 (p=0.208)<br>#Features: 4  | -0.05<br>AUC:0.62 (p=0.242)<br>#Features: 2  | 0.18<br>AUC:0.61 (p=0.138)<br>#Features: 4  |                                             | 0.15<br>AUC:0.62 (p=0.204)<br>#Features: 4  | 0.26<br>AUC:0.61 (p=0.129)<br>#Features: 16 | 0.02<br>AUC:0.6 (p=0.14)<br>#Features: 4    | 0.23<br>AUC:0.62 (p=0.218)<br>#Features: 2  |
| XGBoost             | 0.16<br>AUC:0.62 (p=0.254)<br>#Features: 4  | 0.01<br>AUC:0.59 (p=0.054)<br>#Features: 8   | 0.17<br>AUC:0.62 (p=0.296)<br>#Features: 32 | 0.05<br>AUC:0.59 (p=0.062)<br>#Features: 8  | 0.11<br>AUC:0.63 (p=0.318)<br>#Features: 16 | 0.18<br>AUC:0.62 (p=0.317)<br>#Features: 8  |                                             | 0.36<br>AUC:0.65 (p=0.673)<br>#Features: 4  |
|                     | Anova                                       | Bhattacharyya                                | ET                                          | FCBF                                        | Kendall                                     | LASSO                                       | MM                                          | MFRMR                                       |

Figure S31: Similarity of the models on dataset Carvalho2018. The best model is framed with a blue border, models that were significantly different to the best model are not shown. Statistical significance was tested using a DeLong test.

## Similarity on Hosny2018A

|                     |       |                                             |                                             |                                             |                                             |                                             |                                             |                                              |
|---------------------|-------|---------------------------------------------|---------------------------------------------|---------------------------------------------|---------------------------------------------|---------------------------------------------|---------------------------------------------|----------------------------------------------|
| LDA                 |       | 0.05<br>AUC:0.6 (p=0.287)<br>#Features: 8   | 0.0<br>AUC:0.58 (p=0.125)<br>#Features: 4   | -0.01<br>AUC:0.58 (p=0.115)<br>#Features: 1 | 0.07<br>AUC:0.57 (p=0.061)<br>#Features: 8  | 0.03<br>AUC:0.59 (p=0.128)<br>#Features: 16 | 0.29<br>AUC:0.58 (p=0.075)<br>#Features: 32 | -0.01<br>AUC:0.6 (p=0.257)<br>#Features: 64  |
| Logistic Regression |       | 0.03<br>AUC:0.59 (p=0.08)<br>#Features: 16  | 0.05<br>AUC:0.61 (p=0.345)<br>#Features: 8  | 0.0<br>AUC:0.59 (p=0.197)<br>#Features: 4   | -0.01<br>AUC:0.58 (p=0.128)<br>#Features: 1 | 0.07<br>AUC:0.58 (p=0.094)<br>#Features: 16 | 0.03<br>AUC:0.59 (p=0.202)<br>#Features: 16 | -0.01<br>AUC:0.6 (p=0.303)<br>#Features: 64  |
| Naive Bayes         |       |                                             | 0.0<br>AUC:0.58 (p=0.113)<br>#Features: 2   |                                             | 0.0<br>AUC:0.57 (p=0.064)<br>#Features: 8   |                                             | 0.03<br>AUC:0.57 (p=0.078)<br>#Features: 16 | 0.26<br>AUC:0.59 (p=0.194)<br>#Features: 16  |
| Neural Network      |       | 0.06<br>AUC:0.59 (p=0.354)<br>#Features: 64 | 0.02<br>AUC:0.63 (p=0.673)<br>#Features: 64 | 0.01<br>AUC:0.62 (p=0.596)<br>#Features: 64 | -0.01<br>AUC:0.61 (p=0.409)<br>#Features: 4 | 0.06<br>AUC:0.58 (p=0.139)<br>#Features: 4  | 0.02<br>AUC:0.62 (p=0.503)<br>#Features: 8  | 0.29<br>AUC:0.64 (p=1.0)<br>#Features: 32    |
| RBF-SVM             |       | 0.06<br>AUC:0.59 (p=0.148)<br>#Features: 64 | 0.03<br>AUC:0.6 (p=0.232)<br>#Features: 32  | 0.01<br>AUC:0.61 (p=0.403)<br>#Features: 16 | -0.01<br>AUC:0.58 (p=0.127)<br>#Features: 4 | 0.07<br>AUC:0.59 (p=0.163)<br>#Features: 16 | 0.03<br>AUC:0.61 (p=0.343)<br>#Features: 16 | -0.01<br>AUC:0.62 (p=0.509)<br>#Features: 32 |
| Random Forest       |       | 0.06<br>AUC:0.58 (p=0.077)<br>#Features: 64 | 0.03<br>AUC:0.58 (p=0.079)<br>#Features: 32 |                                             | 0.0<br>AUC:0.58 (p=0.111)<br>#Features: 8   |                                             | 0.01<br>AUC:0.59 (p=0.106)<br>#Features: 64 | -0.01<br>AUC:0.62 (p=0.451)<br>#Features: 64 |
| SVM                 |       | 0.06<br>AUC:0.6 (p=0.207)<br>#Features: 64  | 0.05<br>AUC:0.61 (p=0.417)<br>#Features: 8  | 0.0<br>AUC:0.59 (p=0.16)<br>#Features: 4    | -0.01<br>AUC:0.57 (p=0.104)<br>#Features: 4 | 0.07<br>AUC:0.58 (p=0.082)<br>#Features: 8  | 0.03<br>AUC:0.59 (p=0.194)<br>#Features: 16 | 0.31<br>AUC:0.6 (p=0.306)<br>#Features: 64   |
| XGBoost             |       | 0.06<br>AUC:0.57 (p=0.063)<br>#Features: 64 |                                             | 0.01<br>AUC:0.58 (p=0.092)<br>#Features: 64 | 0.0<br>AUC:0.58 (p=0.122)<br>#Features: 8   | 0.03<br>AUC:0.57 (p=0.081)<br>#Features: 64 | 0.01<br>AUC:0.59 (p=0.18)<br>#Features: 32  | -0.01<br>AUC:0.6 (p=0.25)<br>#Features: 32   |
|                     | Anova | Bhattacharyya                               | ET                                          | FCBF                                        | Kendall                                     | LASSO                                       | MM                                          | MRMRe                                        |

Figure S32: Similarity of the models on dataset Hosny2018A. The best model is framed with a blue border, models that were significantly different to the best model are not shown. Statistical significance was tested using a DeLong test.

### Similarity on Hosny2018B

|                     |                                             |                                             |                                             |                                             |                                             |                                            |                                             |                                            |
|---------------------|---------------------------------------------|---------------------------------------------|---------------------------------------------|---------------------------------------------|---------------------------------------------|--------------------------------------------|---------------------------------------------|--------------------------------------------|
| LDA                 |                                             |                                             |                                             |                                             |                                             | 0.05<br>AUC:0.71 (p=0.495)<br>#Features: 8 | 0.25<br>AUC:0.69 (p=0.212)<br>#Features: 32 |                                            |
| Logistic Regression |                                             |                                             | 0.01<br>AUC:0.69 (p=0.22)<br>#Features: 64  |                                             |                                             | 0.05<br>AUC:0.72 (p=0.726)<br>#Features: 8 | 0.25<br>AUC:0.69 (p=0.086)<br>#Features: 32 |                                            |
| Naive Bayes         | 0.66<br>AUC:0.69 (p=0.074)<br>#Features: 64 | 0.18<br>AUC:0.68 (p=0.051)<br>#Features: 64 |                                             |                                             |                                             | 0.05<br>AUC:0.68 (p=0.139)<br>#Features: 8 |                                             |                                            |
| Neural Network      | 0.76<br>AUC:0.73 (p=1.0)<br>#Features: 32   |                                             | 0.18<br>AUC:0.68 (p=0.076)<br>#Features: 8  | 0.01<br>AUC:0.67 (p=0.196)<br>#Features: 64 | 0.48<br>AUC:0.66 (p=0.064)<br>#Features: 32 | 0.01<br>AUC:0.71 (p=0.463)<br>#Features: 4 | 0.25<br>AUC:0.69 (p=0.385)<br>#Features: 32 | 0.0<br>AUC:0.68 (p=0.25)<br>#Features: 32  |
| RBF-SVM             |                                             |                                             |                                             | 0.01<br>AUC:0.65 (p=0.086)<br>#Features: 64 |                                             | 0.05<br>AUC:0.65 (p=0.054)<br>#Features: 8 |                                             | 0.02<br>AUC:0.66 (p=0.191)<br>#Features: 8 |
| Random Forest       |                                             | 0.06<br>AUC:0.65 (p=0.056)<br>#Features: 2  | 0.18<br>AUC:0.67 (p=0.124)<br>#Features: 4  |                                             |                                             |                                            |                                             |                                            |
| SVM                 |                                             |                                             |                                             | 0.01<br>AUC:0.67 (p=0.1)<br>#Features: 64   |                                             | 0.05<br>AUC:0.71 (p=0.403)<br>#Features: 8 |                                             | 0.03<br>AUC:0.67 (p=0.07)<br>#Features: 16 |
| XGBoost             | 0.76<br>AUC:0.68 (p=0.096)<br>#Features: 32 | 0.03<br>AUC:0.67 (p=0.054)<br>#Features: 1  | 0.17<br>AUC:0.67 (p=0.124)<br>#Features: 32 | -0.01<br>AUC:0.66 (p=0.079)<br>#Features: 2 |                                             |                                            |                                             |                                            |
|                     | Anova                                       | Bhattacharyya                               | ET                                          | FCBF                                        | Kendall                                     | LASSO                                      | MM                                          | MFRMe                                      |

Figure S33: Similarity of the models on dataset Hosny2018B. The best model is framed with a blue border, models that were significantly different to the best model are not shown. Statistical significance was tested using a DeLong test.



### Similarity on Hosny2018C

|                     |                                             |                                             |    |                                              |                                             |                                             |                                             |       |
|---------------------|---------------------------------------------|---------------------------------------------|----|----------------------------------------------|---------------------------------------------|---------------------------------------------|---------------------------------------------|-------|
| LDA                 |                                             |                                             |    |                                              |                                             |                                             |                                             |       |
| Logistic Regression |                                             |                                             |    |                                              |                                             |                                             |                                             |       |
| Naive Bayes         |                                             |                                             |    |                                              |                                             |                                             |                                             |       |
| Neural Network      |                                             | 0.0<br>AUC:0.57 (p=0.059)<br>#Features: 2   |    | -0.03<br>AUC:0.56 (p=0.064)<br>#Features: 32 |                                             | 0.01<br>AUC:0.57 (p=0.057)<br>#Features: 2  | -0.01<br>AUC:0.58 (p=0.109)<br>#Features: 4 |       |
| RBF-SVM             | -0.01<br>AUC:0.61 (p=0.254)<br>#Features: 1 | 0.02<br>AUC:0.63 (p=0.261)<br>#Features: 32 |    | 0.87<br>AUC:0.69 (p=1.0)<br>#Features: 64    | -0.01<br>AUC:0.57 (p=0.052)<br>#Features: 4 | 0.04<br>AUC:0.66 (p=0.557)<br>#Features: 8  | -0.01<br>AUC:0.62 (p=0.291)<br>#Features: 1 |       |
| Random Forest       |                                             |                                             |    |                                              |                                             |                                             |                                             |       |
| SVM                 |                                             | 0.02<br>AUC:0.59 (p=0.077)<br>#Features: 32 |    | 0.87<br>AUC:0.68 (p=0.824)<br>#Features: 64  |                                             | 0.01<br>AUC:0.62 (p=0.254)<br>#Features: 64 |                                             |       |
| XGBoost             |                                             |                                             |    | -0.01<br>AUC:0.57 (p=0.076)<br>#Features: 1  |                                             |                                             | -0.01<br>AUC:0.59 (p=0.134)<br>#Features: 4 |       |
|                     | Anova                                       | Bhattacharyya                               | ET | FCBF                                         | Kendall                                     | LASSO                                       | MM                                          | MFRMR |

Figure S34: Similarity of the models on dataset Hosny2018C. The best model is framed with a blue border, models that were significantly different to the best model are not shown. Statistical significance was tested using a DeLong test.

### Similarity on Ramella2018

|                     |                                              |                                           |                                             |                                             |                                              |                                            |                                            |                                             |
|---------------------|----------------------------------------------|-------------------------------------------|---------------------------------------------|---------------------------------------------|----------------------------------------------|--------------------------------------------|--------------------------------------------|---------------------------------------------|
| LDA                 |                                              |                                           | 0.17<br>AUC:0.73 (p=0.137)<br>#Features: 64 | 0.04<br>AUC:0.69 (p=0.062)<br>#Features: 64 |                                              | 0.43<br>AUC:0.8 (p=0.804)<br>#Features: 64 |                                            | 0.41<br>AUC:0.75 (p=0.188)<br>#Features: 64 |
| Logistic Regression | -0.09<br>AUC:0.7 (p=0.091)<br>#Features: 64  |                                           | 0.17<br>AUC:0.77 (p=0.5)<br>#Features: 64   | 0.29<br>AUC:0.76 (p=0.436)<br>#Features: 16 |                                              | 0.62<br>AUC:0.81 (p=1.0)<br>#Features: 32  | 0.0<br>AUC:0.73 (p=0.158)<br>#Features: 64 | 0.41<br>AUC:0.76 (p=0.235)<br>#Features: 32 |
| Naive Bayes         |                                              |                                           |                                             |                                             |                                              |                                            |                                            |                                             |
| Neural Network      |                                              | 0.11<br>AUC:0.7 (p=0.096)<br>#Features: 8 | 0.17<br>AUC:0.71 (p=0.079)<br>#Features: 64 | 0.04<br>AUC:0.73 (p=0.243)<br>#Features: 64 | -0.04<br>AUC:0.71 (p=0.156)<br>#Features: 16 | 0.43<br>AUC:0.79 (p=0.75)<br>#Features: 64 |                                            | 0.41<br>AUC:0.74 (p=0.164)<br>#Features: 64 |
| RBF-SVM             |                                              |                                           |                                             | 0.29<br>AUC:0.71 (p=0.125)<br>#Features: 16 |                                              | 0.62<br>AUC:0.74 (p=0.11)<br>#Features: 32 |                                            |                                             |
| Random Forest       |                                              |                                           |                                             |                                             |                                              |                                            |                                            |                                             |
| SVM                 | -0.09<br>AUC:0.71 (p=0.126)<br>#Features: 64 |                                           | 0.17<br>AUC:0.75 (p=0.19)<br>#Features: 64  | 0.29<br>AUC:0.77 (p=0.485)<br>#Features: 16 |                                              | 0.62<br>AUC:0.81 (p=1.0)<br>#Features: 32  | 0.0<br>AUC:0.72 (p=0.127)<br>#Features: 64 | 0.41<br>AUC:0.77 (p=0.319)<br>#Features: 32 |
| XGBoost             |                                              |                                           |                                             |                                             |                                              |                                            |                                            |                                             |
|                     | Anova                                        | Bhattacharyya                             | ET                                          | FCBF                                        | Kendall                                      | LASSO                                      | MM                                         | MFRMe                                       |

Figure S35: Similarity of the models on dataset Ramella2018. The best model is framed with a blue border, models that were significantly different to the best model are not shown. Statistical significance was tested using a DeLong test.

### Similarity on Lu2019

|                     |                                              |                                              |                                             |                                             |                                              |                                             |                                              |                                             |
|---------------------|----------------------------------------------|----------------------------------------------|---------------------------------------------|---------------------------------------------|----------------------------------------------|---------------------------------------------|----------------------------------------------|---------------------------------------------|
| LDA                 |                                              |                                              |                                             |                                             |                                              |                                             |                                              | 0.19<br>AUC:0.71 (p=0.074)<br>#Features: 16 |
| Logistic Regression |                                              | -0.01<br>AUC:0.72 (p=0.335)<br>#Features: 64 |                                             |                                             | -0.03<br>AUC:0.7 (p=0.134)<br>#Features: 16  |                                             |                                              | 0.19<br>AUC:0.73 (p=0.423)<br>#Features: 16 |
| Naive Bayes         |                                              |                                              |                                             |                                             |                                              |                                             |                                              |                                             |
| Neural Network      | -0.02<br>AUC:0.68 (p=0.057)<br>#Features: 16 | -0.01<br>AUC:0.71 (p=0.188)<br>#Features: 64 | 0.03<br>AUC:0.73 (p=0.433)<br>#Features: 32 | 0.85<br>AUC:0.73 (p=0.392)<br>#Features: 32 | -0.04<br>AUC:0.72 (p=0.269)<br>#Features: 32 | -0.01<br>AUC:0.71 (p=0.294)<br>#Features: 8 | -0.01<br>AUC:0.7 (p=0.107)<br>#Features: 64  | 0.19<br>AUC:0.75 (p=0.902)<br>#Features: 16 |
| RBF-SVM             |                                              | -0.01<br>AUC:0.72 (p=0.239)<br>#Features: 64 | 0.06<br>AUC:0.72 (p=0.283)<br>#Features: 64 | 0.85<br>AUC:0.72 (p=0.235)<br>#Features: 32 | -0.04<br>AUC:0.69 (p=0.101)<br>#Features: 32 |                                             | -0.01<br>AUC:0.69 (p=0.086)<br>#Features: 64 | 0.19<br>AUC:0.71 (p=0.121)<br>#Features: 16 |
| Random Forest       |                                              |                                              |                                             | 0.85<br>AUC:0.78 (p=1.0)<br>#Features: 32   |                                              |                                             | 0.22<br>AUC:0.71 (p=0.062)<br>#Features: 64  | 0.31<br>AUC:0.72 (p=0.113)<br>#Features: 32 |
| SVM                 |                                              | -0.01<br>AUC:0.72 (p=0.281)<br>#Features: 64 | 0.06<br>AUC:0.69 (p=0.08)<br>#Features: 64  |                                             | -0.03<br>AUC:0.7 (p=0.123)<br>#Features: 16  |                                             |                                              | 0.19<br>AUC:0.73 (p=0.302)<br>#Features: 16 |
| XGBoost             |                                              |                                              |                                             | 0.38<br>AUC:0.73 (p=0.493)<br>#Features: 8  |                                              |                                             | 0.22<br>AUC:0.71 (p=0.218)<br>#Features: 64  | 0.3<br>AUC:0.73 (p=0.416)<br>#Features: 64  |
|                     | Anova                                        | Bhattacharyya                                | ET                                          | FCBF                                        | Kendall                                      | LASSO                                       | MM                                           | MFRMR                                       |

Figure S36: Similarity of the models on dataset Lu2019. The best model is framed with a blue border, models that were significantly different to the best model are not shown. Statistical significance was tested using a DeLong test.

## Similarity on Sasaki2019

|                     |                                             |                                             |                                            |                                              |                                             |                                             |                                            |                                            |
|---------------------|---------------------------------------------|---------------------------------------------|--------------------------------------------|----------------------------------------------|---------------------------------------------|---------------------------------------------|--------------------------------------------|--------------------------------------------|
| LDA                 | 0.66<br>AUC:0.62 (p=0.386)<br>#Features: 4  | 0.44<br>AUC:0.61 (p=0.306)<br>#Features: 2  | 0.3<br>AUC:0.61 (p=0.325)<br>#Features: 1  |                                              | 0.45<br>AUC:0.64 (p=0.607)<br>#Features: 2  | 0.0<br>AUC:0.54 (p=0.067)<br>#Features: 1   | 0.0<br>AUC:0.58 (p=0.122)<br>#Features: 4  | 0.29<br>AUC:0.64 (p=0.621)<br>#Features: 1 |
| Logistic Regression | 0.66<br>AUC:0.62 (p=0.395)<br>#Features: 4  | 0.55<br>AUC:0.61 (p=0.288)<br>#Features: 4  | 0.3<br>AUC:0.61 (p=0.331)<br>#Features: 1  | -0.03<br>AUC:0.57 (p=0.096)<br>#Features: 64 | 0.45<br>AUC:0.64 (p=0.595)<br>#Features: 2  | -0.01<br>AUC:0.54 (p=0.062)<br>#Features: 2 | 0.0<br>AUC:0.59 (p=0.155)<br>#Features: 4  | 0.29<br>AUC:0.64 (p=0.611)<br>#Features: 1 |
| Naive Bayes         | 0.43<br>AUC:0.62 (p=0.328)<br>#Features: 32 | 0.43<br>AUC:0.61 (p=0.241)<br>#Features: 16 | 0.2<br>AUC:0.61 (p=0.248)<br>#Features: 64 | -0.03<br>AUC:0.55 (p=0.059)<br>#Features: 64 | 0.49<br>AUC:0.64 (p=0.585)<br>#Features: 16 |                                             | 0.0<br>AUC:0.6 (p=0.24)<br>#Features: 4    | 0.29<br>AUC:0.64 (p=0.621)<br>#Features: 1 |
| Neural Network      | 0.66<br>AUC:0.62 (p=0.431)<br>#Features: 4  | 0.55<br>AUC:0.65 (p=0.721)<br>#Features: 4  | 0.31<br>AUC:0.63 (p=0.5)<br>#Features: 8   | -0.03<br>AUC:0.65 (p=0.772)<br>#Features: 64 | 0.45<br>AUC:0.64 (p=0.649)<br>#Features: 4  | -0.01<br>AUC:0.66 (p=0.936)<br>#Features: 4 | 0.0<br>AUC:0.66 (p=0.88)<br>#Features: 64  | 0.29<br>AUC:0.66 (p=0.9)<br>#Features: 1   |
| RBF-SVM             | 0.59<br>AUC:0.6 (p=0.187)<br>#Features: 8   | 0.43<br>AUC:0.58 (p=0.147)<br>#Features: 16 | 0.3<br>AUC:0.61 (p=0.343)<br>#Features: 2  | -0.01<br>AUC:0.63 (p=0.578)<br>#Features: 8  | 0.49<br>AUC:0.61 (p=0.343)<br>#Features: 16 | -0.01<br>AUC:0.62 (p=0.497)<br>#Features: 4 | 0.0<br>AUC:0.59 (p=0.194)<br>#Features: 64 | 0.29<br>AUC:0.59 (p=0.187)<br>#Features: 1 |
| Random Forest       | 0.59<br>AUC:0.63 (p=0.382)<br>#Features: 8  | 0.5<br>AUC:0.59 (p=0.101)<br>#Features: 101 | 0.31<br>AUC:0.6 (p=0.207)<br>#Features: 8  | -0.03<br>AUC:0.62 (p=0.407)<br>#Features: 64 | 0.49<br>AUC:0.64 (p=0.636)<br>#Features: 16 | -0.01<br>AUC:0.61 (p=0.398)<br>#Features: 4 | 0.0<br>AUC:0.57 (p=0.068)<br>#Features: 32 | 0.29<br>AUC:0.62 (p=0.412)<br>#Features: 1 |
| SVM                 | 0.66<br>AUC:0.63 (p=0.454)<br>#Features: 4  | 0.43<br>AUC:0.64 (p=0.66)<br>#Features: 16  | 0.3<br>AUC:0.59 (p=0.2)<br>#Features: 1    | -0.03<br>AUC:0.59 (p=0.342)<br>#Features: 32 | 0.45<br>AUC:0.64 (p=0.624)<br>#Features: 2  | 0.0<br>AUC:0.56 (p=0.104)<br>#Features: 1   | -0.01<br>AUC:0.58 (p=0.09)<br>#Features: 2 | 0.29<br>AUC:0.63 (p=0.558)<br>#Features: 1 |
| XGBoost             | 0.59<br>AUC:0.67 (p=1.0)<br>#Features: 8    | 0.44<br>AUC:0.63 (p=0.534)<br>#Features: 2  | 0.3<br>AUC:0.63 (p=0.506)<br>#Features: 4  | -0.03<br>AUC:0.65 (p=0.789)<br>#Features: 64 | 0.49<br>AUC:0.65 (p=0.69)<br>#Features: 16  | -0.01<br>AUC:0.63 (p=0.547)<br>#Features: 4 | 0.0<br>AUC:0.63 (p=0.57)<br>#Features: 4   | 0.29<br>AUC:0.63 (p=0.561)<br>#Features: 1 |
|                     | Anova                                       | Bhattacharyya                               | ET                                         | FCBF                                         | Kendall                                     | LASSO                                       | MM                                         | MFRMR                                      |

Figure S37: Similarity of the models on dataset Sasaki2019. The best model is framed with a blue border, models that were significantly different to the best model are not shown. Statistical significance was tested using a DeLong test.

## Similarity on Toivonen2019

|                     |                                            |                                            |                                             |      |                                             |                                             |                                             |                                             |
|---------------------|--------------------------------------------|--------------------------------------------|---------------------------------------------|------|---------------------------------------------|---------------------------------------------|---------------------------------------------|---------------------------------------------|
| LDA                 | 0.35<br>AUC:0.83 (p=0.525)<br>#Features: 1 |                                            | 0.14<br>AUC:0.82 (p=0.455)<br>#Features: 4  |      | 0.31<br>AUC:0.83 (p=0.411)<br>#Features: 32 | 0.07<br>AUC:0.77 (p=0.187)<br>#Features: 32 | 0.17<br>AUC:0.77 (p=0.175)<br>#Features: 16 | 0.09<br>AUC:0.78 (p=0.173)<br>#Features: 64 |
| Logistic Regression | 0.35<br>AUC:0.84 (p=0.619)<br>#Features: 1 | 0.0<br>AUC:0.73 (p=0.054)<br>#Features: 8  | 0.09<br>AUC:0.82 (p=0.455)<br>#Features: 16 |      | 0.35<br>AUC:0.83 (p=0.408)<br>#Features: 16 | 0.07<br>AUC:0.77 (p=0.188)<br>#Features: 32 | 0.17<br>AUC:0.78 (p=0.22)<br>#Features: 16  | 0.1<br>AUC:0.77 (p=0.114)<br>#Features: 32  |
| Naive Bayes         | 0.35<br>AUC:0.82 (p=0.463)<br>#Features: 1 | 0.0<br>AUC:0.72 (p=0.052)<br>#Features: 64 | 0.14<br>AUC:0.76 (p=0.112)<br>#Features: 4  |      |                                             | 0.1<br>AUC:0.74 (p=0.059)<br>#Features: 16  | 0.1<br>AUC:0.79 (p=0.091)<br>#Features: 4   |                                             |
| Neural Network      | 0.35<br>AUC:0.83 (p=0.442)<br>#Features: 1 | 0.0<br>AUC:0.74 (p=0.097)<br>#Features: 32 | 0.09<br>AUC:0.83 (p=0.516)<br>#Features: 16 |      | 0.31<br>AUC:0.85 (p=0.744)<br>#Features: 32 | 0.07<br>AUC:0.81 (p=0.409)<br>#Features: 32 | 0.13<br>AUC:0.8 (p=0.314)<br>#Features: 2   | 0.09<br>AUC:0.82 (p=0.486)<br>#Features: 64 |
| RBF-SVM             | 0.19<br>AUC:0.77 (p=0.071)<br>#Features: 8 |                                            | 0.14<br>AUC:0.79 (p=0.218)<br>#Features: 4  |      |                                             | 0.07<br>AUC:0.79 (p=0.253)<br>#Features: 32 | 0.17<br>AUC:0.72 (p=0.065)<br>#Features: 16 | 0.1<br>AUC:0.74 (p=0.061)<br>#Features: 32  |
| Random Forest       | 0.35<br>AUC:0.85 (p=0.741)<br>#Features: 1 |                                            | 0.09<br>AUC:0.79 (p=0.175)<br>#Features: 16 |      | 0.37<br>AUC:0.83 (p=0.195)<br>#Features: 8  |                                             |                                             | 0.18<br>AUC:0.74 (p=0.057)<br>#Features: 4  |
| SVM                 | 0.35<br>AUC:0.84 (p=0.574)<br>#Features: 1 |                                            | 0.09<br>AUC:0.83 (p=0.48)<br>#Features: 16  |      | 0.31<br>AUC:0.86 (p=0.733)<br>#Features: 32 | 0.07<br>AUC:0.78 (p=0.243)<br>#Features: 32 | 0.15<br>AUC:0.79 (p=0.217)<br>#Features: 8  | 0.1<br>AUC:0.8 (p=0.302)<br>#Features: 32   |
| XGBoost             | 0.35<br>AUC:0.83 (p=0.408)<br>#Features: 1 |                                            | 0.09<br>AUC:0.81 (p=0.359)<br>#Features: 16 |      | 0.37<br>AUC:0.87 (p=1.0)<br>#Features: 8    | 0.07<br>AUC:0.76 (p=0.117)<br>#Features: 32 | 0.17<br>AUC:0.76 (p=0.112)<br>#Features: 16 | 0.1<br>AUC:0.75 (p=0.085)<br>#Features: 32  |
|                     | Anova                                      | Bhattacharyya                              | ET                                          | FCBF | Kendall                                     | LASSO                                       | MM                                          | MRFMR                                       |

Figure S38: Similarity of the models on dataset Toivonen2019. The best model is framed with a blue border, models that were significantly different to the best model are not shown. Statistical significance was tested using a DeLong test.

## Similarity on Keek2020

|                     |                                             |                                             |                                             |                                              |                                             |                                             |                                             |       |
|---------------------|---------------------------------------------|---------------------------------------------|---------------------------------------------|----------------------------------------------|---------------------------------------------|---------------------------------------------|---------------------------------------------|-------|
| LDA                 | 0.0<br>AUC:0.65 (p=0.137)<br>#Features: 4   | 0.0<br>AUC:0.64 (p=0.117)<br>#Features: 1   | 0.0<br>AUC:0.65 (p=0.183)<br>#Features: 2   |                                              | 0.0<br>AUC:0.65 (p=0.191)<br>#Features: 1   | 0.0<br>AUC:0.68 (p=0.709)<br>#Features: 8   | 0.01<br>AUC:0.64 (p=0.109)<br>#Features: 8  |       |
| Logistic Regression | 0.0<br>AUC:0.66 (p=0.233)<br>#Features: 16  | 0.02<br>AUC:0.66 (p=0.27)<br>#Features: 64  | 0.0<br>AUC:0.66 (p=0.242)<br>#Features: 9   | -0.01<br>AUC:0.65 (p=0.126)<br>#Features: 64 | 0.0<br>AUC:0.65 (p=0.185)<br>#Features: 1   | 0.17<br>AUC:0.68 (p=0.145)<br>#Features: 2  | 0.01<br>AUC:0.68 (p=0.787)<br>#Features: 8  |       |
| Naive Bayes         | 0.01<br>AUC:0.65 (p=0.225)<br>#Features: 32 | 0.02<br>AUC:0.66 (p=0.356)<br>#Features: 64 | 0.0<br>AUC:0.66 (p=0.299)<br>#Features: 32  | -0.01<br>AUC:0.64 (p=0.154)<br>#Features: 64 | 0.05<br>AUC:0.65 (p=0.151)<br>#Features: 64 | 0.21<br>AUC:0.65 (p=0.137)<br>#Features: 4  | 0.0<br>AUC:0.67 (p=0.629)<br>#Features: 8   |       |
| Neural Network      | 0.0<br>AUC:0.66 (p=0.338)<br>#Features: 4   | 0.0<br>AUC:0.65 (p=0.213)<br>#Features: 1   | 0.0<br>AUC:0.65 (p=0.134)<br>#Features: 1   |                                              | 0.03<br>AUC:0.65 (p=0.195)<br>#Features: 16 | 0.17<br>AUC:0.68 (p=0.56)<br>#Features: 2   | 0.01<br>AUC:0.67 (p=0.21)<br>#Features: 32  |       |
| RBF-SVM             | 0.0<br>AUC:0.64 (p=0.063)<br>#Features: 64  | 0.0<br>AUC:0.65 (p=0.213)<br>#Features: 1   | 0.02<br>AUC:0.63 (p=0.054)<br>#Features: 64 | -0.01<br>AUC:0.63 (p=0.053)<br>#Features: 64 | 0.0<br>AUC:0.65 (p=0.153)<br>#Features: 4   | 0.17<br>AUC:0.66 (p=0.107)<br>#Features: 2  | 0.02<br>AUC:0.66 (p=0.459)<br>#Features: 64 |       |
| Random Forest       | 0.0<br>AUC:0.64 (p=0.18)<br>#Features: 64   | 0.02<br>AUC:0.67 (p=0.466)<br>#Features: 64 | 0.0<br>AUC:0.64 (p=0.168)<br>#Features: 8   |                                              | 0.05<br>AUC:0.66 (p=0.441)<br>#Features: 64 | 0.18<br>AUC:0.64 (p=0.074)<br>#Features: 32 | 0.02<br>AUC:0.68 (p=0.725)<br>#Features: 64 |       |
| SVM                 | 0.0<br>AUC:0.66 (p=0.374)<br>#Features: 16  | 0.0<br>AUC:0.65 (p=0.143)<br>#Features: 1   | 0.0<br>AUC:0.65 (p=0.247)<br>#Features: 2   |                                              | 0.0<br>AUC:0.65 (p=0.221)<br>#Features: 4   | 0.17<br>AUC:0.69 (p=1.0)<br>#Features: 2    | 0.01<br>AUC:0.66 (p=0.715)<br>#Features: 8  |       |
| XGBoost             | 0.0<br>AUC:0.65 (p=0.28)<br>#Features: 16   | 0.0<br>AUC:0.63 (p=0.132)<br>#Features: 16  | 0.0<br>AUC:0.65 (p=0.305)<br>#Features: 8   |                                              | 0.02<br>AUC:0.65 (p=0.236)<br>#Features: 8  | 0.18<br>AUC:0.63 (p=0.069)<br>#Features: 32 | 0.02<br>AUC:0.64 (p=0.156)<br>#Features: 64 |       |
|                     | Anova                                       | Bhattacharyya                               | ET                                          | FCBF                                         | Kendall                                     | LASSO                                       | MM                                          | MFRMR |

Figure S39: Similarity of the models on dataset Keek2020. The best model is framed with a blue border, models that were significantly different to the best model are not shown. Statistical significance was tested using a DeLong test.

## Similarity on Li2020

|                     |                                             |                                             |                                             |      |                                             |                                             |    |                                             |
|---------------------|---------------------------------------------|---------------------------------------------|---------------------------------------------|------|---------------------------------------------|---------------------------------------------|----|---------------------------------------------|
| LDA                 | 0.29<br>AUC:0.78 (p=0.075)<br>#Features: 64 | 0.72<br>AUC:0.84 (p=0.197)<br>#Features: 32 | 0.18<br>AUC:0.77 (p=0.07)<br>#Features: 16  |      | 0.19<br>AUC:0.78 (p=0.095)<br>#Features: 32 | 0.15<br>AUC:0.76 (p=0.051)<br>#Features: 16 |    |                                             |
| Logistic Regression | 0.29<br>AUC:0.81 (p=0.139)<br>#Features: 64 | 0.72<br>AUC:0.89 (p=1.0)<br>#Features: 32   | 0.21<br>AUC:0.79 (p=0.097)<br>#Features: 32 |      | 0.19<br>AUC:0.8 (p=0.157)<br>#Features: 32  | 0.04<br>AUC:0.81 (p=0.183)<br>#Features: 64 |    | 0.12<br>AUC:0.78 (p=0.051)<br>#Features: 16 |
| Naive Bayes         |                                             |                                             |                                             |      |                                             |                                             |    |                                             |
| Neural Network      | 0.23<br>AUC:0.83 (p=0.361)<br>#Features: 32 | 0.65<br>AUC:0.87 (p=0.702)<br>#Features: 64 | 0.18<br>AUC:0.8 (p=0.211)<br>#Features: 16  |      | 0.24<br>AUC:0.8 (p=0.173)<br>#Features: 64  | 0.15<br>AUC:0.87 (p=0.69)<br>#Features: 16  |    | 0.12<br>AUC:0.87 (p=0.718)<br>#Features: 16 |
| RBF-SVM             |                                             | 0.47<br>AUC:0.8 (p=0.152)<br>#Features: 8   | 0.18<br>AUC:0.77 (p=0.096)<br>#Features: 16 |      |                                             | 0.15<br>AUC:0.89 (p=0.887)<br>#Features: 16 |    | 0.12<br>AUC:0.83 (p=0.291)<br>#Features: 16 |
| Random Forest       | 0.23<br>AUC:0.77 (p=0.068)<br>#Features: 32 | 0.65<br>AUC:0.84 (p=0.34)<br>#Features: 64  | 0.21<br>AUC:0.78 (p=0.067)<br>#Features: 32 |      | 0.24<br>AUC:0.77 (p=0.053)<br>#Features: 64 | 0.15<br>AUC:0.8 (p=0.151)<br>#Features: 16  |    | 0.12<br>AUC:0.83 (p=0.298)<br>#Features: 32 |
| SVM                 | 0.29<br>AUC:0.8 (p=0.121)<br>#Features: 64  | 0.72<br>AUC:0.89 (p=0.729)<br>#Features: 32 | 0.18<br>AUC:0.8 (p=0.165)<br>#Features: 16  |      | 0.19<br>AUC:0.82 (p=0.251)<br>#Features: 32 | 0.04<br>AUC:0.81 (p=0.201)<br>#Features: 64 |    |                                             |
| XGBoost             |                                             | 0.65<br>AUC:0.82 (p=0.236)<br>#Features: 64 | 0.16<br>AUC:0.82 (p=0.194)<br>#Features: 64 |      |                                             | 0.18<br>AUC:0.79 (p=0.065)<br>#Features: 4  |    |                                             |
|                     | Anova                                       | Bhattacharyya                               | ET                                          | FCBF | Kendall                                     | LASSO                                       | MM | MIRMe                                       |

Figure S40: Similarity of the models on dataset Li2020. The best model is framed with a blue border, models that were significantly different to the best model are not shown. Statistical significance was tested using a DeLong test.

## Similarity on Park2020

|                     |                                             |                                             |                                             |                                             |                                             |                                             |                                             |                                              |
|---------------------|---------------------------------------------|---------------------------------------------|---------------------------------------------|---------------------------------------------|---------------------------------------------|---------------------------------------------|---------------------------------------------|----------------------------------------------|
| LDA                 | 0.73<br>AUC:0.64 (p=0.443)<br>#Features: 64 | 0.45<br>AUC:0.63 (p=0.22)<br>#Features: 32  | 0.14<br>AUC:0.62 (p=0.144)<br>#Features: 32 | 0.0<br>AUC:0.62 (p=0.113)<br>#Features: 64  | 0.64<br>AUC:0.63 (p=0.199)<br>#Features: 64 | 0.02<br>AUC:0.63 (p=0.364)<br>#Features: 32 | 0.1<br>AUC:0.62 (p=0.154)<br>#Features: 64  | -0.04<br>AUC:0.61 (p=0.051)<br>#Features: 64 |
| Logistic Regression | 0.73<br>AUC:0.64 (p=0.509)<br>#Features: 64 | 0.54<br>AUC:0.64 (p=0.617)<br>#Features: 64 | 0.14<br>AUC:0.62 (p=0.147)<br>#Features: 64 | 0.0<br>AUC:0.62 (p=0.125)<br>#Features: 64  | 0.64<br>AUC:0.63 (p=0.292)<br>#Features: 64 | 0.0<br>AUC:0.64 (p=0.631)<br>#Features: 64  | 0.1<br>AUC:0.63 (p=0.209)<br>#Features: 64  | -0.04<br>AUC:0.61 (p=0.062)<br>#Features: 64 |
| Naive Bayes         | 0.73<br>AUC:0.62 (p=0.092)<br>#Features: 64 | 0.29<br>AUC:0.62 (p=0.083)<br>#Features: 16 |                                             | 0.0<br>AUC:0.61 (p=0.096)<br>#Features: 64  | 0.64<br>AUC:0.62 (p=0.137)<br>#Features: 64 |                                             | 0.09<br>AUC:0.61 (p=0.068)<br>#Features: 32 |                                              |
| Neural Network      | 0.73<br>AUC:0.65 (p=1.0)<br>#Features: 64   | 0.21<br>AUC:0.62 (p=0.143)<br>#Features: 4  | 0.14<br>AUC:0.63 (p=0.414)<br>#Features: 64 | 0.01<br>AUC:0.61 (p=0.091)<br>#Features: 32 | 0.64<br>AUC:0.63 (p=0.385)<br>#Features: 64 | 0.0<br>AUC:0.64 (p=0.741)<br>#Features: 64  | 0.1<br>AUC:0.63 (p=0.483)<br>#Features: 64  |                                              |
| RBF-SVM             | 0.73<br>AUC:0.62 (p=0.229)<br>#Features: 64 |                                             |                                             | 0.0<br>AUC:0.6 (p=0.073)<br>#Features: 64   | 0.64<br>AUC:0.61 (p=0.079)<br>#Features: 64 | 0.02<br>AUC:0.61 (p=0.142)<br>#Features: 32 |                                             |                                              |
| Random Forest       | 0.73<br>AUC:0.61 (p=0.079)<br>#Features: 64 | 0.54<br>AUC:0.61 (p=0.079)<br>#Features: 64 |                                             |                                             |                                             | 0.02<br>AUC:0.61 (p=0.063)<br>#Features: 32 | 0.1<br>AUC:0.61 (p=0.061)<br>#Features: 64  |                                              |
| SVM                 | 0.73<br>AUC:0.64 (p=0.374)<br>#Features: 64 | 0.54<br>AUC:0.63 (p=0.24)<br>#Features: 64  | 0.14<br>AUC:0.61 (p=0.068)<br>#Features: 32 | 0.0<br>AUC:0.61 (p=0.088)<br>#Features: 64  | 0.64<br>AUC:0.64 (p=0.325)<br>#Features: 64 | 0.02<br>AUC:0.63 (p=0.351)<br>#Features: 32 | 0.1<br>AUC:0.62 (p=0.263)<br>#Features: 64  |                                              |
| XGBoost             | 0.73<br>AUC:0.62 (p=0.232)<br>#Features: 64 | 0.54<br>AUC:0.62 (p=0.217)<br>#Features: 64 |                                             | 0.0<br>AUC:0.62 (p=0.227)<br>#Features: 64  | 0.64<br>AUC:0.62 (p=0.191)<br>#Features: 64 | 0.0<br>AUC:0.63 (p=0.296)<br>#Features: 64  | 0.1<br>AUC:0.6 (p=0.051)<br>#Features: 64   |                                              |
|                     | Anova                                       | Bhattacharyya                               | ET                                          | FCBF                                        | Kendall                                     | LASSO                                       | MM                                          | MRFMR                                        |

Figure S41: Similarity of the models on dataset Park2020. The best model is framed with a blue border, models that were significantly different to the best model are not shown. Statistical significance was tested using a DeLong test.



### Similarity on Song2020

|                     |                                             |               |                                             |                                             |         |                                             |                                             |       |
|---------------------|---------------------------------------------|---------------|---------------------------------------------|---------------------------------------------|---------|---------------------------------------------|---------------------------------------------|-------|
| LDA                 |                                             |               |                                             |                                             |         |                                             |                                             |       |
| Logistic Regression | 0.49<br>AUC:0.96 (p=0.109)<br>#Features: 64 |               | 0.41<br>AUC:0.96 (p=0.112)<br>#Features: 64 |                                             |         |                                             |                                             |       |
| Naive Bayes         |                                             |               |                                             |                                             |         |                                             |                                             |       |
| Neural Network      | 0.49<br>AUC:0.96 (p=0.058)<br>#Features: 64 |               | 0.41<br>AUC:0.96 (p=0.115)<br>#Features: 64 |                                             |         | 0.29<br>AUC:0.96 (p=0.224)<br>#Features: 64 | 0.8<br>AUC:0.98 (p=1.0)<br>#Features: 32    |       |
| RBF-SVM             |                                             |               |                                             |                                             |         |                                             |                                             |       |
| Random Forest       |                                             |               |                                             |                                             |         |                                             |                                             |       |
| SVM                 | 0.49<br>AUC:0.97 (p=0.178)<br>#Features: 64 |               | 0.41<br>AUC:0.96 (p=0.104)<br>#Features: 64 |                                             |         |                                             | 0.59<br>AUC:0.96 (p=0.054)<br>#Features: 64 |       |
| XGBoost             |                                             |               |                                             | 0.24<br>AUC:0.96 (p=0.114)<br>#Features: 32 |         |                                             |                                             |       |
|                     | Anova                                       | Bhattacharyya | ET                                          | FCBF                                        | Kendall | LASSO                                       | MM                                          | MFRMe |

Figure S42: Similarity of the models on dataset Song2020. The best model is framed with a blue border, models that were significantly different to the best model are not shown. Statistical significance was tested using a DeLong test.

## Similarity on Veeraraghavan2020

|                     |                                              |                                              |                                             |                                              |                                             |                                             |                                             |                                             |
|---------------------|----------------------------------------------|----------------------------------------------|---------------------------------------------|----------------------------------------------|---------------------------------------------|---------------------------------------------|---------------------------------------------|---------------------------------------------|
| LDA                 |                                              |                                              | -0.02<br>AUC:0.57 (p=0.302)<br>#Features: 8 |                                              |                                             | -0.01<br>AUC:0.57 (p=0.293)<br>#Features: 1 |                                             |                                             |
| Logistic Regression |                                              |                                              | -0.02<br>AUC:0.58 (p=0.409)<br>#Features: 8 | 0.05<br>AUC:0.5 (p=0.057)<br>#Features: 64   |                                             | -0.01<br>AUC:0.57 (p=0.268)<br>#Features: 1 |                                             |                                             |
| Naive Bayes         | -0.01<br>AUC:0.55 (p=0.247)<br>#Features: 64 |                                              | -0.02<br>AUC:0.56 (p=0.273)<br>#Features: 8 | 0.05<br>AUC:0.53 (p=0.14)<br>#Features: 64   | 0.38<br>AUC:0.53 (p=0.159)<br>#Features: 8  | -0.01<br>AUC:0.58 (p=0.358)<br>#Features: 2 | 0.01<br>AUC:0.51 (p=0.071)<br>#Features: 16 |                                             |
| Neural Network      | 0.03<br>AUC:0.55 (p=0.188)<br>#Features: 16  | -0.01<br>AUC:0.57 (p=0.288)<br>#Features: 4  | 0.09<br>AUC:0.53 (p=0.083)<br>#Features: 64 | -0.04<br>AUC:0.63 (p=0.914)<br>#Features: 32 | 0.05<br>AUC:0.58 (p=0.329)<br>#Features: 64 | 0.62<br>AUC:0.61 (p=0.581)<br>#Features: 2  | 0.05<br>AUC:0.64 (p=0.957)<br>#Features: 4  | 0.03<br>AUC:0.58 (p=0.376)<br>#Features: 8  |
| RBF-SVM             | 0.04<br>AUC:0.54 (p=0.097)<br>#Features: 1   | -0.01<br>AUC:0.57 (p=0.324)<br>#Features: 4  | 0.12<br>AUC:0.52 (p=0.08)<br>#Features: 32  | 0.13<br>AUC:0.63 (p=0.911)<br>#Features: 64  | 0.1<br>AUC:0.57 (p=0.309)<br>#Features: 1   | 0.62<br>AUC:0.63 (p=0.896)<br>#Features: 2  | 0.08<br>AUC:0.55 (p=0.134)<br>#Features: 8  | 0.03<br>AUC:0.55 (p=0.182)<br>#Features: 8  |
| Random Forest       |                                              | -0.01<br>AUC:0.58 (p=0.382)<br>#Features: 2  |                                             | -0.01<br>AUC:0.59 (p=0.44)<br>#Features: 1   |                                             | 0.62<br>AUC:0.62 (p=0.495)<br>#Features: 2  | -0.01<br>AUC:0.54 (p=0.131)<br>#Features: 2 |                                             |
| SVM                 | 0.06<br>AUC:0.5 (p=0.059)<br>#Features: 32   | -0.01<br>AUC:0.57 (p=0.286)<br>#Features: 64 |                                             | 0.13<br>AUC:0.57 (p=0.322)<br>#Features: 64  | 0.05<br>AUC:0.56 (p=0.215)<br>#Features: 64 |                                             | -0.01<br>AUC:0.58 (p=0.384)<br>#Features: 1 | 0.03<br>AUC:0.54 (p=0.163)<br>#Features: 64 |
| XGBoost             | 0.04<br>AUC:0.51 (p=0.058)<br>#Features: 64  | -0.03<br>AUC:0.56 (p=0.317)<br>#Features: 16 |                                             | -0.03<br>AUC:0.62 (p=0.706)<br>#Features: 16 |                                             | 0.62<br>AUC:0.64 (p=1.0)<br>#Features: 2    | 0.08<br>AUC:0.6 (p=0.588)<br>#Features: 8   | -0.01<br>AUC:0.54 (p=0.205)<br>#Features: 1 |
|                     | Anova                                        | Bhattacharyya                                | ET                                          | FCBF                                         | Kendall                                     | LASSO                                       | MM                                          | MIRMe                                       |

Figure S43: Similarity of the models on dataset Veeraraghavan2020. The best model is framed with a blue border, models that were significantly different to the best model are not shown. Statistical significance was tested using a DeLong test.
